# Supplementary material for: Solid-state spectroscopic properties and the geometry of binuclear rhodium(i) diisocyanoalkane complexes
Source: Royal Society of Chemistry journal article supplement (doi:10.1039/b412942c), 2004-01-01
Supplement: b412942c.doc [file b412942c.doc]

**Solid-State Spectroscopic Properties and the Geometry of**

**Binuclear Rh(I) Diisocyanoalkane Complexes**

Oksana Gerlits, Andrey Yu. Kovalevsky Philip Coppens*

Chemistry Department, University at Buffalo, State University of New York,

Buffalo, NY 14260, E-mail: [*coppens@buffalo.edu*](mailto:coppens@buffalo.edu)

Tetraphenylborate counterion in **1** is disordered into two equally occupied positions through the inversion center. Disordered carbon atoms were refined isotropically. The B–CAr bonds of [BPh4]1- were constrained to their ideal values of 1.643Å.1

In **2** central –CH2 - groups (C3 and C9) of the two trans diprop ligands are disordered, with population refined to ~ 80/20% for each atom. The 20% populated carbons were refined isotropically. The C2–C3A, C2–C3B and C8–C9B bonds were constrained to their ideal values of 1.513Å.

Benzonitrile and chlorobenzene solvent molecules in **3** occupy the same crystallographic site, with population 80/20%, respectively. Their atoms were refined isotropically, while C1S–C7S, N1S–C7S and C1S–Cl1S bonds were constrained to their ideal values of 1.500Å, 1.150Å and 1.700Å, respectively.

In **4** C2, C3 and C12, C13 carbon atoms of the two trans ligands are disordered with the population 65/35% for each pair. They were refined isotropically. All C–C bonds for the 35% populated carbons, and C2A–N1, C2B–N1 and C12A–N5 were constrained to the ideal values 1.513Å and 1.450Å, respectively. Additionally two calixarene anions occupy the same crystallographic site, with the population ~ 50/50%. Bonds C104–C103, C104–C78 and C62–C61, C62–C64 in the disordered calixarene molecules were constrained to the ideal 1.500Å value. Benzene rings of all calixarene molecules were constrained geometrically to be ideal hexagons with 1.390Å CAr–CAr bonds. Anisotropic thermal parameters of C24, C25, C49, C50, C60 atoms were restrained to behave isotropically with the estimated standard deviation of 0.002.

In compound **5** carbon atoms C6, C7, C8 and nitrogen atom N2 of one dihex ligand are disordered with 70/30% population. In addition F8 of [PF6]1- is also disordered over two positions with the 70/30% population. Disordered carbon atoms were refined isotropically and C2N2B and N2B–C6B were fixed to their ideal values 1.144Å and 1.450Å respectevily.

Anisotropic thermal parameters of some atoms in **6** were restrained to behave isotropically with the estimated standard deviation of 0.002. C–C and C–O bonds of the ethanol solvent were constrained to their ideal values 1.513Å and 1.413Å, respectively.

In both **7** and **8** center-of-symmetry related dimen ligands are disordered with different refined populations for each pair of ligands, being 80/20% for one pair and 86/14% for the other in **7,** and 60/40% and 70/30% in **8**. In addition acetonitrile solvent molecule in **7** is disordered through center of symmetry. All disordered atoms and oxygen of partially occupied water molecule in **8** were refined isotropically. Majority of C–C bonds of disordered dimen ligands in **7** and **8** and C–C and CN bonds of CH3CN in **7** were constrained to their ideal values 1.513Å, 1.470Å and 1.136Å, respectively.

1. F.H.Allen, O.Kennard, D.G.Watson, L.Brammer, A.J.Orpen, R.Taylor, *J. Chem. Soc., Perkin Trans. II*, **1987**, 1-19.

**Table S1.** Atomic Fractional Coordinates and Isotropic Thermal Parameters for

[Rh2(diprop)4][BPh4]2 (**1**) at 90K.

_________________________________________________________________

Atom x y z Ueq(Å2)

_________________________________________________________________

Rh(1) 3409(1) 10748(1) 20175(1) 27(1)

N(1) 1736(7) 9305(5) 19374(5) 36(2)

N(2) 2589(7) 9084(5) 22484(5) 34(2)

N(3) 5325(7) 11992(5) 21023(5) 37(2)

N(4) 4493(7) 12265(5) 17825(5) 30(1)

C(1) 2320(8) 9870(6) 19678(5) 29(2)

C(2) 1198(9) 8543(7) 18958(7) 51(2)

C(3) 2821(8) 9720(6) 21636(6) 28(2)

C(4) 2374(9) 8241(6) 23521(5) 42(2)

C(5) 3163(9) 7123(6) 23490(6) 39(2)

C(6) 4581(9) 11580(6) 20692(5) 31(2)

C(7) 6270(10) 12469(7) 21468(7) 51(2)

C(8) 7873(10) 12528(8) 20901(8) 61(3)

C(9) 4046(8) 11739(6) 18701(6) 30(2)

C(10) 5137(9) 12901(6) 16734(5) 39(2)

B(1) 2618(7) 12244(5) 14472(5) 16(3)

C(11) 1034(7) 12014(7) 14192(7) 21(3)

C(12) -48(9) 12897(5) 14055(7) 30(3)

C(13) -1411(8) 12751(6) 13847(8) 53(5)

C(14) -1693(7) 11723(7) 13777(7) 12(3)

C(15) -611(9) 10840(6) 13914(7) 25(3)

C(16) 752(8) 10985(6) 14122(7) 32(3)

C(17) 3492(8) 13310(5) 13478(5) 17(3)

C(18) 4770(8) 13699(6) 13605(5) 17(3)

C(19) 5529(7) 14587(6) 12796(6) 21(3)

C(20) 5010(9) 15086(6) 11860(5) 26(3)

C(21) 3732(9) 14698(6) 11733(5) 30(3)

C(22) 2973(7) 13810(6) 12542(6) 22(3)

C(23) 1996(9) 12541(6) 15603(5) 15(3)

C(24) 1455(10) 11674(5) 16531(6) 27(3)

C(25) 764(10) 11919(5) 17458(5) 24(3)

C(26) 614(9) 13031(6) 17457(5) 26(3)

C(27) 1155(10) 13898(5) 16529(6) 27(3)

C(28) 1846(10) 13653(5) 15602(5) 44(4)

C(29) 3811(8) 11118(5) 14636(6) 20(3)

C(30) 4260(10) 10694(7) 13788(5) 33(4)

C(31) 5283(11) 9775(7) 13854(6) 43(4)

C(32) 5857(10) 9279(7) 14768(8) 46(5)

C(33) 5408(11) 9702(8) 15615(6) 37(4)

C(34) 4385(10) 10621(7) 15549(5) 13(3)

B(2) -812(8) 15319(6) 17835(6) 34(4)

C(50) -2644(7) 15320(8) 17880(6) 25(3)

C(51) -3611(9) 14711(8) 18804(5) 36(4)

C(52) -5087(8) 14573(8) 18785(6) 37(4)

C(53) -5597(7) 15045(9) 17843(7) 38(4)

C(54) -4630(9) 15654(8) 16919(6) 41(4)

C(55) -3153(8) 15792(7) 16938(5) 31(3)

C(56) -117(12) 16574(6) 17128(9) 56(2)

C(57) 1437(11) 16625(8) 16760(9) 56(2)

C(58) 2098(9) 17667(10) 16286(9) 56(2)

C(59) 1205(13) 18658(7) 16180(9) 56(2)

C(60) -349(12) 18607(7) 16548(9) 56(2)

C(61) -1010(9) 17565(9) 17022(9) 56(2)

C(68) -52(14) 14293(9) 17343(10) 70(2)

C(69) -307(14) 13202(11) 18042(8) 70(2)

C(70) 280(15) 12279(8) 17712(9) 70(2)

C(71) 1123(14) 12447(8) 16683(10) 70(2)

C(72) 1379(14) 13538(10) 15984(8) 70(2)

C(73) 791(15) 14461(7) 16314(9) 70(2)

C(62) -1077(9) 15752(7) 19592(6) 50(2)

C(63) -267(9) 15127(7) 18959(6) 43(2)

C(64) 820(9) 14381(7) 19400(7) 50(2) _________________________________________________________________

**Table S2.** Anisotropic displacement parameters (Å2x103) for [Rh2(diprop)4][BPh4]2 (**1**) at 90K.

_______________________________________________________________________

Atom U11 U22 U33 U23 U13 U12

_______________________________________________________________________

Rh(1) 34(1) 27(1) 21(1) -11(1) -6(1) 1(1)

N(1) 39(4) 45(4) 27(3) -17(3) -9(3) 1(3)

N(2) 42(4) 35(4) 26(4) -12(3) -4(3) -5(3)

N(3) 50(4) 34(4) 34(4) -21(3) -12(3) 2(3)

N(4) 39(4) 28(3) 27(4) -12(3) -7(3) -3(3)

C(1) 31(4) 36(4) 20(4) -11(3) -3(3) 2(4)

C(2) 48(5) 72(6) 52(5) -36(5) -22(4) -9(5)

C(3) 36(4) 26(4) 28(4) -16(4) -9(4) 0(3)

C(4) 49(5) 47(5) 20(4) -1(4) 0(4) -10(4)

C(5) 56(5) 38(5) 20(4) -3(3) -5(4) -20(4)

C(6) 44(5) 25(4) 24(4) -12(3) -5(4) 6(4)

C(7) 71(6) 48(5) 58(6) -38(5) -30(5) 2(5)

C(8) 63(6) 66(6) 76(7) -39(5) -22(5) -21(5)

C(9) 40(5) 25(4) 30(5) -11(4) -11(4) -2(3)

C(10) 71(6) 30(4) 14(4) 2(3) -15(4) -9(4)

B(1) 13(7) 21(8) 17(8) -5(6) -11(6) -3(6)

B(2) 30(10) 45(11) 17(9) 3(8) -1(7) -15(8) _______________________________________________________________________

**Table S3.** Selected Bond Lengths (Å) and Angles () for [Rh2(diprop)4][BPh4]2 (**1**) at 90K.

________________________________________________________________________

Rh(1)-C(1) 1.945(8)

Rh(1)-C(3) 1.962(8)

Rh(1)-C(9) 1.964(8)

Rh(1)-C(6) 1.973(8)

N(1)-C(1) 1.169(9)

N(1)-C(2) 1.452(9)

N(2)-C(3) 1.149(8)

N(2)-C(4) 1.438(9)

N(3)-C(6) 1.154(9)

N(3)-C(7) 1.451(9)

N(4)-C(9) 1.153(8)

N(4)-C(10) 1.445(9)

C(2)-C(8)#1 1.49(1)

C(4)-C(5) 1.51(1)

C(5)-C(10)#1 1.51(1)

C(7)-C(8) 1.48(1)

C(8)-C(2)#1 1.49(1)

C(10)-C(5)#1 1.51(1)

B(1)-C(23) 1.666(5)

B(1)-C(11) 1.666(5)

B(1)-C(29) 1.667(5)

B(1)-C(17) 1.668(5)

C(11)-C(12) 1.3900

C(11)-C(16) 1.3900

C(12)-C(13) 1.3900

C(13)-C(14) 1.3900

C(14)-C(15) 1.3900

C(15)-C(16) 1.3900

C(17)-C(18) 1.3900

C(17)-C(22) 1.3900

C(18)-C(19) 1.3900

C(19)-C(20) 1.3900

C(20)-C(21) 1.3900

C(21)-C(22) 1.3900

C(23)-C(24) 1.3900

C(23)-C(28) 1.3900

C(24)-C(25) 1.3900

C(25)-C(26) 1.3900

C(26)-C(27) 1.3900

C(27)-C(28) 1.3900

C(29)-C(30) 1.3900

C(29)-C(34) 1.3900

C(30)-C(31) 1.3900

C(31)-C(32) 1.3900

C(32)-C(33) 1.3900

C(33)-C(34) 1.3900

B(2)-C(56) 1.657(5)

B(2)-C(63) 1.660(5)

B(2)-C(68) 1.660(5)

B(2)-C(50) 1.662(5)

C(50)-C(51) 1.3900

C(50)-C(55) 1.3900

C(51)-C(52) 1.3900

C(52)-C(53) 1.3900

C(53)-C(54) 1.3900

C(54)-C(55) 1.3900

C(56)-C(57) 1.3900

C(56)-C(61) 1.3900

C(57)-C(58) 1.3900

C(58)-C(59) 1.3900

C(59)-C(60) 1.3900

C(60)-C(61) 1.3900

C(68)-C(69) 1.3900

C(68)-C(73) 1.3900

C(69)-C(70) 1.3900

C(70)-C(71) 1.3900

C(71)-C(72) 1.3900

C(72)-C(73) 1.3900

C(62)-C(63) 1.39(1)

C(62)-C(64)#3 1.41(1)

C(63)-C(64) 1.38(1)

C(64)-C(62)#3 1.41(1)

________________________________________________________________________

________________________________________________________________________

C(1)-Rh(1)-C(3) 90.1(3)

C(1)-Rh(1)-C(9) 89.4(3)

C(3)-Rh(1)-C(9) 178.1(3)

C(1)-Rh(1)-C(6) 177.4(3)

C(3)-Rh(1)-C(6) 88.9(3)

C(9)-Rh(1)-C(6) 91.4(3)

C(1)-N(1)-C(2) 172.9(7)

C(3)-N(2)-C(4) 176.3(7)

C(6)-N(3)-C(7) 177.8(8)

C(9)-N(4)-C(10) 176.8(7)

N(1)-C(1)-Rh(1) 176.2(6)

N(1)-C(2)-C(8)#1 112.0(7)

N(2)-C(3)-Rh(1) 174.7(6)

N(2)-C(4)-C(5) 112.1(6)

C(10)#1-C(5)-C(4) 115.6(6)

N(3)-C(6)-Rh(1) 174.9(6)

N(3)-C(7)-C(8) 113.8(6)

C(7)-C(8)-C(2)#1 118.1(8)

N(4)-C(9)-Rh(1) 175.4(6)

N(4)-C(10)-C(5)#1 112.3(6)

C(23)-B(1)-C(11) 102.8(5)

C(23)-B(1)-C(29) 111.1(5)

C(11)-B(1)-C(29) 112.5(5)

C(23)-B(1)-C(17) 113.1(5)

C(11)-B(1)-C(17) 109.6(5)

C(29)-B(1)-C(17) 107.9(5)

C(12)-C(11)-C(16) 120.0

C(12)-C(11)-B(1) 117.1(5)

C(16)-C(11)-B(1) 122.9(5)

C(13)-C(12)-C(11) 120.0

C(14)-C(13)-C(12) 120.0

C(13)-C(14)-C(15) 120.0

C(16)-C(15)-C(14) 120.0

C(15)-C(16)-C(11) 120.0

C(18)-C(17)-C(22) 120.0

C(18)-C(17)-B(1) 118.2(5)

C(22)-C(17)-B(1) 121.8(5)

C(19)-C(18)-C(17) 120.0

C(20)-C(19)-C(18) 120.0

C(19)-C(20)-C(21) 120.0

C(22)-C(21)-C(20) 120.0

C(21)-C(22)-C(17) 120.0

C(24)-C(23)-C(28) 120.0

C(24)-C(23)-B(1) 118.8(5)

C(28)-C(23)-B(1) 120.7(5)

C(25)-C(24)-C(23) 120.0

C(26)-C(25)-C(24) 120.0

C(25)-C(26)-C(27) 120.0

C(26)-C(27)-C(28) 120.0

C(27)-C(28)-C(23) 120.0

C(30)-C(29)-C(34) 120.0

C(30)-C(29)-B(1) 116.7(6)

C(34)-C(29)-B(1) 123.3(6)

C(31)-C(30)-C(29) 120.0

C(30)-C(31)-C(32) 120.0

C(31)-C(32)-C(33) 120.0

C(34)-C(33)-C(32) 120.0

C(33)-C(34)-C(29) 120.0

C(56)-B(2)-C(63) 99.4(6)

C(56)-B(2)-C(68) 114.0(7)

C(63)-B(2)-C(68) 109.4(7)

C(56)-B(2)-C(50) 111.6(6)

C(63)-B(2)-C(50) 118.4(6)

C(68)-B(2)-C(50) 104.5(7)

C(51)-C(50)-C(55) 120.0

C(51)-C(50)-B(2) 120.6(6)

C(55)-C(50)-B(2) 118.7(6)

C(52)-C(51)-C(50) 120.0

C(53)-C(52)-C(51) 120.0

C(52)-C(53)-C(54) 120.0

C(55)-C(54)-C(53) 120.0

C(54)-C(55)-C(50) 120.0

C(57)-C(56)-C(61) 120.0

C(57)-C(56)-B(2) 117.7(7)

C(61)-C(56)-B(2) 121.8(7)

C(56)-C(57)-C(58) 120.0

C(59)-C(58)-C(57) 120.0

C(58)-C(59)-C(60) 120.0

C(61)-C(60)-C(59) 120.0

C(60)-C(61)-C(56) 120.0

C(69)-C(68)-C(73) 120.0

C(69)-C(68)-B(2) 115.2(8)

C(73)-C(68)-B(2) 124.8(8)

C(70)-C(69)-C(68) 120.0

C(69)-C(70)-C(71) 120.0

C(70)-C(71)-C(72) 120.0

C(73)-C(72)-C(71) 120.0

C(72)-C(73)-C(68) 120.0

C(63)-C(62)-C(64)#3 122.4(8)

C(64)-C(63)-C(62) 114.3(7)

C(64)-C(63)-B(2) 129.7(7)

C(62)-C(63)-B(2) 115.9(7)

C(63)-C(64)-C(62)#3 123.3(8)

________________________________________________________________________

Symmetry transformations used to generate equivalent atoms:

#1 -x+1,-y+2,-z+4 #3 -x,-y+3,-z+4

**Table S4.** Atomic Fractional Coordinates and Isotropic Thermal Parameters for [Rh2(diprop)4][BPh4]2·CH3CN (**2**) at 90K.

_________________________________________________________________

Atom x y z Ueq(Å2)

_________________________________________________________________

Rh(1) 3517(1) 6204(1) 571(1) 14(1)

N(1) 1991(2) 6288(2) 1333(2) 28(1)

N(2) 2082(2) 6287(2) -1305(2) 16(1)

N(3) 5017(2) 6317(2) -220(2) 25(1)

N(4) 4981(2) 6312(2) 2425(2) 25(1)

B(1) 1756(3) 2500 3323(3) 14(1)

B(2) 1542(3) 2500 -2504(3) 12(1)

C(1) 2534(2) 6215(2) 1035(2) 18(1)

C(2) 1372(3) 6455(3) 1777(3) 51(1)

C(3A) 858(4) 7500 1592(4) 20(1)

C(3B) 1120(30) 7500 2070(20) 66(11)

C(4) 2584(2) 6213(2) -613(2) 16(1)

C(5) 1508(2) 6471(2) -2189(2) 17(1)

C(6) 1795(3) 7500 -2506(3) 16(1)

C(7) 4492(2) 6243(3) 97(2) 20(1)

C(8) 5653(3) 6481(3) -650(3) 32(1)

C(9A) 6184(4) 7500 -395(4) 22(1)

C(9B) 5740(30) 7500 -1085(14) 64(9)

C(10) 4455(2) 6240(3) 1735(2) 20(1)

C(11) 5633(3) 6485(3) 3287(2) 32(1)

C(12) 5427(3) 7500 3664(3) 24(1)

C(13) 2461(2) 3545(2) 3571(2) 16(1)

C(14) 2817(2) 3979(3) 3001(2) 27(1)

C(15) 3452(3) 4834(3) 3220(2) 36(1)

C(16) 3753(3) 5284(3) 4019(2) 34(1)

C(17) 3428(2) 4871(3) 4601(2) 25(1)

C(18) 2799(2) 4013(2) 4382(2) 19(1)

C(19) 1043(3) 2500 3826(2) 13(1)

C(20) 679(2) 3451(2) 4016(2) 18(1)

C(21) 39(2) 3451(3) 4404(2) 24(1)

C(22) -273(3) 2500 4615(3) 27(1)

C(23) 1045(3) 2500 2319(3) 15(1)

C(24) 663(2) 3449(3) 1892(2) 21(1)

C(25) -57(2) 3460(3) 1087(2) 24(1)

C(26) -429(3) 2500 692(3) 27(1)

C(27) 2071(2) 3559(2) -2698(2) 13(1)

C(28) 1785(2) 3999(2) -3517(2) 16(1)

C(29) 2216(2) 4886(2) -3700(2) 20(1)

C(30) 2975(2) 5371(2) -3064(2) 22(1)

C(31) 3297(2) 4936(2) -2257(2) 21(1)

C(32) 2855(2) 4049(2) -2081(2) 17(1)

C(33) 1579(3) 2500 -1523(3) 15(1)

C(34) 1544(2) 3452(2) -1103(2) 18(1)

C(35) 1503(2) 3461(3) -304(2) 22(1)

C(36) 1491(3) 2500 106(3) 23(1)

C(37) 405(3) 2500 -3079(2) 13(1)

C(38) -122(2) 3455(2) -3301(2) 17(1)

C(39) -1092(2) 3460(2) -3719(2) 19(1)

C(40) -1586(3) 2500 -3931(3) 20(1)

C(1S) 4903(4) 2500 4187(3) 37(1)

C(2S) 5020(4) 2500 3386(4) 46(2)

N(1S) 5115(4) 2500 2751(4) 71(2) _________________________________________________________________

**Table S5.** Anisotropic displacement parameters (Å2x103) for [Rh2(diprop)4][BPh4]2·CH3CN (**2**) at 90K.

_______________________________________________________________________

Atom U11 U22 U33 U23 U13 U12

_______________________________________________________________________

Rh(1) 15(1) 14(1) 13(1) 0(1) 5(1) 2(1)

N(1) 37(2) 17(1) 38(2) 8(1) 26(1) 8(1)

N(2) 18(1) 14(1) 18(1) 1(1) 8(1) 1(1)

N(3) 30(2) 18(1) 36(2) 0(1) 21(1) 0(1)

N(4) 21(1) 33(2) 17(1) -4(1) 4(1) 6(1)

B(1) 14(2) 14(2) 13(2) 0 6(2) 0

B(2) 13(2) 12(2) 11(2) 0 4(2) 0

C(1) 18(1) 14(1) 20(1) 4(1) 7(1) 6(1)

C(2) 73(3) 30(2) 85(3) 12(2) 71(3) 13(2)

C(3A) 26(3) 20(3) 24(3) 0 21(3) 0

C(4) 19(1) 14(1) 18(1) -1(1) 10(1) 1(1)

C(5) 18(2) 21(2) 11(1) -2(1) 3(1) -1(1)

C(6) 18(2) 20(2) 10(2) 0 6(2) 0

C(7) 21(2) 16(1) 24(2) 1(1) 9(1) 0(1)

C(8) 38(2) 24(2) 48(2) -1(2) 31(2) 1(2)

C(9A) 15(3) 27(3) 27(3) 0 10(2) 0

C(10) 20(2) 20(1) 21(2) -2(1) 9(1) 5(1)

C(11) 29(2) 47(2) 13(2) -4(2) -1(1) 13(2)

C(12) 20(2) 35(3) 14(2) 0 6(2) 0

C(13) 14(1) 13(1) 19(1) 3(1) 3(1) 0(1)

C(14) 23(2) 33(2) 22(2) 4(1) 6(1) -8(1)

C(15) 28(2) 45(2) 28(2) 16(2) 6(2) -17(2)

C(16) 26(2) 27(2) 38(2) 8(2) 0(2) -14(2)

C(17) 22(2) 19(2) 23(2) 0(1) -4(1) -1(1)

C(18) 18(2) 16(2) 19(1) 4(1) 4(1) 2(1)

C(19) 11(2) 16(2) 9(2) 0 0(2) 0

C(20) 15(1) 20(1) 15(1) -2(1) 2(1) 0(1)

C(21) 15(2) 35(2) 16(1) -12(1) 1(1) 2(1)

C(22) 13(2) 53(3) 11(2) 0 2(2) 0

C(23) 11(2) 22(2) 13(2) 0 5(2) 0

C(24) 21(2) 25(2) 17(2) -1(1) 7(1) -3(1)

C(25) 19(2) 38(2) 16(1) 8(1) 7(1) 7(1)

C(26) 16(2) 51(3) 14(2) 0 6(2) 0

C(27) 13(1) 10(1) 17(1) -2(1) 8(1) 2(1)

C(28) 14(1) 17(2) 18(1) 1(1) 7(1) 1(1)

C(29) 21(2) 22(2) 22(2) 4(1) 13(1) 5(1)

C(30) 25(2) 14(1) 35(2) -1(1) 21(2) -2(1)

C(31) 16(2) 21(2) 26(2) -8(1) 10(1) -5(1)

C(32) 15(1) 20(2) 16(1) -2(1) 5(1) 0(1)

C(33) 13(2) 16(2) 17(2) 0 6(2) 0

C(34) 20(2) 17(1) 19(1) -1(1) 9(1) -2(1)

C(35) 21(2) 24(2) 23(2) -7(1) 10(1) -1(1)

C(36) 20(2) 35(3) 17(2) 0 9(2) 0

C(37) 15(2) 16(2) 11(2) 0 8(2) 0

C(38) 18(2) 14(1) 20(1) 0(1) 10(1) -1(1)

C(39) 18(2) 19(1) 24(2) 3(1) 10(1) 4(1)

C(40) 11(2) 26(2) 24(2) 0 7(2) 0

C(1S) 26(3) 53(3) 30(3) 0 10(2) 0

C(2S) 34(3) 69(4) 36(3) 0 16(3) 0

N(1S) 61(4) 109(6) 55(4) 0 36(3) 0 _______________________________________________________________________

**Table S6.** Selected Bond Lengths (Å) and Angles () for [Rh2(diprop)4][BPh4]2·CH3CN (**2**) at 90K.

________________________________________________________________________

Rh(1)-C(10) 1.957(3)

Rh(1)-C(1) 1.969(3)

Rh(1)-C(7) 1.971(3)

Rh(1)-C(4) 1.978(3)

N(1)-C(1) 1.144(4)

N(1)-C(2) 1.450(4)

N(2)-C(4) 1.140(4)

N(2)-C(5) 1.444(3)

N(3)-C(7) 1.141(4)

N(3)-C(8) 1.454(4)

N(4)-C(10) 1.147(4)

N(4)-C(11) 1.443(4)

B(1)-C(19) 1.641(6)

B(1)-C(23) 1.641(6)

B(1)-C(13) 1.642(4)

B(1)-C(13)#1 1.642(4)

B(2)-C(37) 1.649(6)

B(2)-C(27)#1 1.650(4)

B(2)-C(27) 1.650(4)

B(2)-C(33) 1.656(6)

C(2)-C(3A) 1.491(3)

C(2)-C(3B) 1.496(5)

C(3A)-C(2)#2 1.491(4)

C(3B)-C(2)#2 1.496(5)

C(5)-C(6) 1.521(4)

C(6)-C(5)#2 1.521(4)

C(8)-C(9A) 1.480(5)

C(8)-C(9B) 1.501(5)

C(9A)-C(8)#2 1.480(5)

C(9B)-C(8)#2 1.501(5)

C(11)-C(12) 1.507(4)

C(12)-C(11)#2 1.507(4)

C(13)-C(14) 1.401(4)

C(13)-C(18) 1.405(4)

C(14)-C(15) 1.395(5)

C(15)-C(16) 1.380(5)

C(16)-C(17) 1.377(5)

C(17)-C(18) 1.393(4)

C(19)-C(20) 1.401(4)

C(19)-C(20)#1 1.401(4)

C(20)-C(21) 1.390(4)

C(21)-C(22) 1.377(4)

C(22)-C(21)#1 1.377(4)

C(23)-C(24) 1.392(4)

C(23)-C(24)#1 1.392(4)

C(24)-C(25) 1.395(4)

C(25)-C(26) 1.382(4)

C(26)-C(25)#1 1.382(4)

C(27)-C(32) 1.401(4)

C(27)-C(28) 1.405(4)

C(28)-C(29) 1.386(4)

C(29)-C(30) 1.391(5)

C(30)-C(31) 1.383(5)

C(31)-C(32) 1.391(4)

C(33)-C(34)#1 1.397(4)

C(33)-C(34) 1.397(4)

C(34)-C(35) 1.393(4)

C(35)-C(36) 1.388(4)

C(36)-C(35)#1 1.388(4)

C(37)-C(38) 1.406(4)

C(37)-C(38)#1 1.406(4)

C(38)-C(39) 1.389(4)

C(39)-C(40) 1.387(4)

C(40)-C(39)#1 1.388(4)

C(1S)-C(2S) 1.450(8)

C(2S)-N(1S) 1.152(8)

________________________________________________________________________

________________________________________________________________________

C(10)-Rh(1)-C(1) 88.42(12)

C(10)-Rh(1)-C(7) 92.01(12)

C(1)-Rh(1)-C(7) 178.14(12)

C(10)-Rh(1)-C(4) 178.14(13)

C(1)-Rh(1)-C(4) 92.46(12)

C(7)-Rh(1)-C(4) 87.06(12)

C(1)-N(1)-C(2) 174.0(4)

C(4)-N(2)-C(5) 174.0(3)

C(7)-N(3)-C(8) 176.0(3)

C(10)-N(4)-C(11) 175.9(4)

C(19)-B(1)-C(23) 103.6(3)

C(19)-B(1)-C(13) 112.3(2)

C(23)-B(1)-C(13) 112.2(2)

C(19)-B(1)-C(13)#1 112.3(2)

C(23)-B(1)-C(13)#1 112.2(2)

C(13)-B(1)-C(13)#1 104.6(3)

C(37)-B(2)-C(27)#1 112.1(2)

C(37)-B(2)-C(27) 112.1(2)

C(27)#1-B(2)-C(27) 105.8(3)

C(37)-B(2)-C(33) 102.3(3)

C(27)#1-B(2)-C(33) 112.3(2)

C(27)-B(2)-C(33) 112.3(2)

N(1)-C(1)-Rh(1) 175.1(3)

N(1)-C(2)-C(3A) 114.8(4)

N(1)-C(2)-C(3B) 127.5(7)

C(2)-C(3A)-C(2)#2 121.1(5)

C(2)#2-C(3B)-C(2) 120.4(8)

N(2)-C(4)-Rh(1) 174.7(3)

N(2)-C(5)-C(6) 111.2(3)

C(5)-C(6)-C(5)#2 114.4(3)

N(3)-C(7)-Rh(1) 175.1(3)

N(3)-C(8)-C(9A) 112.2(4)

N(3)-C(8)-C(9B) 125(1)

C(8)-C(9A)-C(8)#2 117.7(5)

C(8)-C(9B)-C(8)#2 115.1(8)

N(4)-C(10)-Rh(1) 176.2(3)

N(4)-C(11)-C(12) 112.5(3)

C(11)-C(12)-C(11)#2 113.8(4)

C(14)-C(13)-C(18) 115.6(3)

C(14)-C(13)-B(1) 121.8(3)

C(18)-C(13)-B(1) 122.5(3)

C(15)-C(14)-C(13) 122.2(3)

C(16)-C(15)-C(14) 120.4(3)

C(17)-C(16)-C(15) 119.2(3)

C(16)-C(17)-C(18) 120.2(3)

C(17)-C(18)-C(13) 122.4(3)

C(20)-C(19)-C(20)#1 115.1(4)

C(20)-C(19)-B(1) 122.3(2)

C(20)#1-C(19)-B(1) 122.3(2)

C(21)-C(20)-C(19) 122.4(3)

C(22)-C(21)-C(20) 120.8(3)

C(21)-C(22)-C(21)#1 118.3(4)

C(24)-C(23)-C(24)#1 115.8(4)

C(24)-C(23)-B(1) 121.6(2)

C(24)#1-C(23)-B(1) 121.6(2)

C(23)-C(24)-C(25) 122.7(3)

C(26)-C(25)-C(24) 119.7(3)

C(25)-C(26)-C(25)#1 119.4(4)

C(32)-C(27)-C(28) 115.3(3)

C(32)-C(27)-B(2) 123.1(3)

C(28)-C(27)-B(2) 121.5(3)

C(29)-C(28)-C(27) 122.8(3)

C(28)-C(29)-C(30) 120.1(3)

C(31)-C(30)-C(29) 118.6(3)

C(30)-C(31)-C(32) 120.6(3)

C(31)-C(32)-C(27) 122.4(3)

C(34)#1-C(33)-C(34) 115.9(4)

C(34)#1-C(33)-B(2) 121.9(2)

C(34)-C(33)-B(2) 121.9(2)

C(35)-C(34)-C(33) 122.5(3)

C(36)-C(35)-C(34) 120.2(3)

C(35)-C(36)-C(35)#1 118.7(4)

C(38)-C(37)-C(38)#1 115.2(4)

C(38)-C(37)-B(2) 122.2(2)

C(38)#1-C(37)-B(2) 122.2(2)

C(39)-C(38)-C(37) 122.7(3)

C(40)-C(39)-C(38) 120.4(3)

C(39)-C(40)-C(39)#1 118.7(4)

N(1S)-C(2S)-C(1S) 179.8(7)

________________________________________________________________________

Symmetry transformations used to generate equivalent atoms:

#1 x,-y+1/2,z #2 x,-y+3/2,z

**Table S7.** Atomic Fractional Coordinates and Isotropic Thermal Parameters for [Rh2(diprop)4][BPh4]2·1.6C6H5CN·0.4C6H5Cl (**3**) at 90K.

_________________________________________________________________

Atom x y z Ueq(Å2)

_________________________________________________________________

Rh(1) 1654(1) 258(1) -83(1) 12(1)

B(1) 1783(5) -2687(4) 5928(3) 14(1)

N(1) 1584(4) 1998(3) -2097(3) 14(1)

N(2) 484(4) 2225(3) 628(2) 15(1)

N(3) 1421(4) -1427(3) 2010(3) 19(1)

N(4) 2579(4) -1674(3) -894(2) 16(1)

C(1) 1659(4) 1343(3) -1367(3) 14(1)

C(2) 1496(5) 2804(4) -3023(3) 20(1)

C(3) 947(4) 1490(4) 384(3) 15(1)

C(4) -156(4) 3133(3) 943(3) 17(1)

C(5) -1633(4) 3468(3) 756(3) 16(1)

C(6) 1582(4) -807(4) 1230(3) 17(1)

C(7) 1022(5) -2231(4) 2978(3) 21(1)

C(8) 38(5) -3150(4) 3069(3) 19(1)

C(9) 2306(4) -963(3) -587(3) 15(1)

C(10) 2803(4) -2558(3) -1284(3) 17(1)

C(11) 2914(4) -2671(3) 4931(3) 14(1)

C(12) 3286(4) -1660(4) 4144(3) 17(1)

C(13) 4178(4) -1627(4) 3271(3) 19(1)

C(14) 4730(4) -2621(4) 3148(3) 20(1)

C(15) 4379(5) -3642(4) 3902(3) 21(1)

C(16) 3489(4) -3650(4) 4772(3) 18(1)

C(17) 2004(4) -3832(3) 6834(3) 13(1)

C(18) 3385(4) -4137(3) 6981(3) 14(1)

C(19) 3637(5) -5090(4) 7735(3) 18(1)

C(20) 2488(5) -5789(3) 8373(3) 17(1)

C(21) 1114(5) -5498(3) 8266(3) 16(1)

C(22) 877(4) -4531(3) 7517(3) 14(1)

C(23) 180(4) -2646(3) 5728(3) 13(1)

C(24) -403(5) -3616(4) 5735(3) 17(1)

C(25) -1714(5) -3631(4) 5543(3) 20(1)

C(26) -2519(4) -2631(4) 5306(3) 21(1)

C(27) -1952(4) -1650(4) 5259(3) 18(1)

C(28) -640(4) -1663(3) 5467(3) 13(1)

C(29) 2113(4) -1627(3) 6204(3) 13(1)

C(30) 1071(4) -1135(3) 6762(3) 15(1)

C(31) 1408(4) -343(3) 7084(3) 14(1)

C(32) 2839(4) 0(3) 6855(3) 15(1)

C(33) 3895(4) -455(3) 6304(3) 15(1)

C(34) 3541(4) -1255(3) 5989(3) 12(1)

N(1S) 2862(5) 5821(4) 1393(4) 29(1)

C(1S) 3285(5) 3820(3) 1368(3) 29(1)

C(2S) 3813(5) 3678(4) 495(4) 29(1)

C(3S) 4062(5) 2598(4) 476(4) 29(1)

C(4S) 3760(5) 1662(4) 1308(3) 29(1)

C(5S) 3229(5) 1809(4) 2179(3) 29(1)

C(6S) 2997(5) 2880(4) 2214(4) 29(1)

C(7S) 3004(9) 4945(4) 1379(6) 29(1)

Cl(1S) 3037(9) 5193(5) 1406(6) 29(1) _________________________________________________________________

**Table S8.** Anisotropic displacement parameters (Å2x103) for [Rh2(diprop)4][BPh4]2·1.6C6H5CN·0.4C6H5Cl (**3**) at 90K.

_______________________________________________________________________

Atom U11 U22 U33 U23 U13 U12

_______________________________________________________________________

Rh(1) 15(1) 11(1) 12(1) -5(1) -3(1) 0(1)

B(1) 17(2) 11(2) 13(2) -6(2) -2(2) -3(2)

N(1) 15(2) 13(2) 17(2) -8(2) -4(1) 2(1)

N(2) 19(2) 14(2) 11(2) -4(2) -2(1) -4(2)

N(3) 19(2) 18(2) 22(2) -6(2) -7(2) 0(2)

N(4) 15(2) 17(2) 18(2) -7(2) -6(2) -1(1)

C(1) 16(2) 15(2) 17(2) -12(2) -3(2) -3(2)

C(2) 29(2) 16(2) 12(2) -3(2) -3(2) -4(2)

C(3) 16(2) 17(2) 11(2) -3(2) -3(2) -5(2)

C(4) 21(2) 12(2) 17(2) -9(2) -2(2) -1(2)

C(5) 22(2) 12(2) 15(2) -7(2) -4(2) 2(2)

C(6) 18(2) 16(2) 22(3) -9(2) -9(2) 0(2)

C(7) 26(2) 16(2) 20(2) -3(2) -9(2) -1(2)

C(8) 22(2) 16(2) 21(2) -5(2) -11(2) 4(2)

C(9) 17(2) 11(2) 15(2) -1(2) -6(2) -1(2)

C(10) 17(2) 16(2) 20(2) -12(2) -3(2) 2(2)

C(11) 11(2) 19(2) 14(2) -8(2) -4(2) -4(2)

C(12) 20(2) 18(2) 17(2) -9(2) -4(2) -6(2)

C(13) 16(2) 26(2) 14(2) -6(2) -4(2) -9(2)

C(14) 14(2) 30(3) 17(2) -13(2) -3(2) 3(2)

C(15) 20(2) 23(2) 23(2) -16(2) -4(2) 6(2)

C(16) 21(2) 17(2) 17(2) -7(2) -4(2) -1(2)

C(17) 17(2) 11(2) 13(2) -8(2) -1(2) -1(2)

C(18) 15(2) 13(2) 13(2) -5(2) -3(2) 1(2)

C(19) 20(2) 24(2) 18(2) -14(2) -8(2) 3(2)

C(20) 31(3) 13(2) 11(2) -7(2) -6(2) -1(2)

C(21) 24(2) 14(2) 12(2) -7(2) 0(2) -8(2)

C(22) 16(2) 14(2) 14(2) -9(2) -3(2) 0(2)

C(23) 16(2) 14(2) 7(2) -3(2) 2(2) -4(2)

C(24) 22(2) 17(2) 13(2) -5(2) -5(2) -1(2)

C(25) 20(2) 25(2) 18(2) -8(2) -5(2) -9(2)

C(26) 13(2) 34(3) 13(2) -6(2) -3(2) -1(2)

C(27) 18(2) 21(2) 12(2) -3(2) -4(2) 5(2)

C(28) 16(2) 10(2) 12(2) -3(2) -3(2) 3(2)

C(29) 19(2) 10(2) 8(2) -1(2) -4(2) -2(2)

C(30) 15(2) 15(2) 12(2) -3(2) -1(2) -2(2)

C(31) 20(2) 9(2) 13(2) -5(2) -4(2) 8(2)

C(32) 23(2) 11(2) 14(2) -6(2) -7(2) 0(2)

C(33) 17(2) 15(2) 12(2) -1(2) -4(2) -6(2)

C(34) 14(2) 10(2) 11(2) -3(2) -4(2) 4(2) _______________________________________________________________________

**Table S9.** Selected Bond Lengths (Å) and Angles () for [Rh2(diprop)4][BPh4]2·1.6C6H5CN·0.4C6H5Cl (**3**) at 90K.

________________________________________________________________________

Rh(1)-C(3) 1.962(4)

Rh(1)-C(1) 1.967(4)

Rh(1)-C(9) 1.977(4)

Rh(1)-C(6) 1.979(4)

B(1)-C(11) 1.640(6)

B(1)-C(29) 1.647(6)

B(1)-C(23) 1.650(6)

B(1)-C(17) 1.653(6)

N(1)-C(1) 1.152(5)

N(1)-C(2) 1.448(5)

N(2)-C(3) 1.147(5)

N(2)-C(4) 1.445(5)

N(3)-C(6) 1.158(6)

N(3)-C(7) 1.445(6)

N(4)-C(9) 1.155(5)

N(4)-C(10) 1.446(5)

C(2)-C(8)#1 1.514(6)

C(4)-C(5) 1.518(6)

C(5)-C(10)#1 1.526(6)

C(7)-C(8) 1.518(6)

C(8)-C(2)#1 1.514(6)

C(10)-C(5)#1 1.526(6)

C(11)-C(16) 1.396(6)

C(11)-C(12) 1.402(6)

C(12)-C(13) 1.391(6)

C(13)-C(14) 1.385(6)

C(14)-C(15) 1.384(6)

C(15)-C(16) 1.397(6)

C(17)-C(22) 1.401(6)

C(17)-C(18) 1.405(6)

C(18)-C(19) 1.396(6)

C(19)-C(20) 1.393(6)

C(20)-C(21) 1.378(6)

C(21)-C(22) 1.397(6)

C(23)-C(28) 1.399(6)

C(23)-C(24) 1.403(6)

C(24)-C(25) 1.380(6)

C(25)-C(26) 1.404(6)

C(26)-C(27) 1.383(6)

C(27)-C(28) 1.386(6)

C(29)-C(30) 1.407(6)

C(29)-C(34) 1.410(6)

C(30)-C(31) 1.385(6)

C(31)-C(32) 1.398(6)

C(32)-C(33) 1.379(6)

C(33)-C(34) 1.392(6)

N(1S)-C(7S) 1.120(4)

C(1S)-C(6S) 1.393(7)

C(1S)-C(2S) 1.398(7)

C(1S)-C(7S) 1.439(4)

C(1S)-Cl(1S) 1.765(4)

C(2S)-C(3S) 1.384(7)

C(3S)-C(4S) 1.378(7)

C(4S)-C(5S) 1.398(7)

C(5S)-C(6S) 1.380(7)

________________________________________________________________________

________________________________________________________________________

C(3)-Rh(1)-C(1) 87.5(2)

C(3)-Rh(1)-C(9) 177.5(2)

C(1)-Rh(1)-C(9) 90.7(2)

C(3)-Rh(1)-C(6) 90.8(2)

C(1)-Rh(1)-C(6) 177.9(2)

C(9)-Rh(1)-C(6) 91.0(2)

C(11)-B(1)-C(29) 110.8(3)

C(11)-B(1)-C(23) 104.1(3)

C(29)-B(1)-C(23) 114.3(3)

C(11)-B(1)-C(17) 111.1(3)

C(29)-B(1)-C(17) 104.3(3)

C(23)-B(1)-C(17) 112.5(3)

C(1)-N(1)-C(2) 178.8(4)

C(3)-N(2)-C(4) 177.7(4)

C(6)-N(3)-C(7) 171.9(4)

C(9)-N(4)-C(10) 175.4(4)

N(1)-C(1)-Rh(1) 176.0(4)

N(1)-C(2)-C(8)#1 112.7(3)

N(2)-C(3)-Rh(1) 176.4(4)

N(2)-C(4)-C(5) 112.8(3)

C(4)-C(5)-C(10)#1 115.9(3)

N(3)-C(6)-Rh(1) 174.5(4)

N(3)-C(7)-C(8) 111.2(4)

C(2)#1-C(8)-C(7) 116.3(4)

N(4)-C(9)-Rh(1) 174.5(3)

N(4)-C(10)-C(5)#1 111.5(3)

C(16)-C(11)-C(12) 115.0(4)

C(16)-C(11)-B(1) 123.4(4)

C(12)-C(11)-B(1) 121.4(4)

C(13)-C(12)-C(11) 122.8(4)

C(14)-C(13)-C(12) 120.1(4)

C(15)-C(14)-C(13) 119.2(4)

C(14)-C(15)-C(16) 119.5(4)

C(11)-C(16)-C(15) 123.4(4)

C(22)-C(17)-C(18) 115.3(4)

C(22)-C(17)-B(1) 124.3(4)

C(18)-C(17)-B(1) 120.3(3)

C(19)-C(18)-C(17) 122.9(4)

C(20)-C(19)-C(18) 119.7(4)

C(21)-C(20)-C(19) 119.0(4)

C(20)-C(21)-C(22) 120.6(4)

C(21)-C(22)-C(17) 122.4(4)

C(28)-C(23)-C(24) 114.9(4)

C(28)-C(23)-B(1) 124.4(3)

C(24)-C(23)-B(1) 120.5(4)

C(25)-C(24)-C(23) 123.5(4)

C(24)-C(25)-C(26) 119.7(4)

C(27)-C(26)-C(25) 118.3(4)

C(26)-C(27)-C(28) 120.7(4)

C(27)-C(28)-C(23) 122.8(4)

C(30)-C(29)-C(34) 115.3(4)

C(30)-C(29)-B(1) 124.0(4)

C(34)-C(29)-B(1) 120.2(3)

C(31)-C(30)-C(29) 122.9(4)

C(30)-C(31)-C(32) 119.8(4)

C(33)-C(32)-C(31) 119.2(4)

C(32)-C(33)-C(34) 120.3(4)

C(33)-C(34)-C(29) 122.4(4)

C(6S)-C(1S)-C(2S) 120.3(4)

C(6S)-C(1S)-C(7S) 120.5(5)

C(2S)-C(1S)-C(7S) 119.2(5)

C(6S)-C(1S)-Cl(1S) 119.6(4)

C(2S)-C(1S)-Cl(1S) 120.1(4)

C(3S)-C(2S)-C(1S) 119.6(4)

C(4S)-C(3S)-C(2S) 120.6(5)

C(3S)-C(4S)-C(5S) 119.6(5)

C(6S)-C(5S)-C(4S) 120.7(5)

C(5S)-C(6S)-C(1S) 119.3(4)

N(1S)-C(7S)-C(1S) 176.0(8)

________________________________________________________________________

Symmetry transformations used to generate equivalent atoms:

#1 -x,-y,-z

**Table S10.** Atomic Fractional Coordinates and Isotropic Thermal Parameters for [Rh2(diprop)4][Calix]2 (**4**) at 90K.

_________________________________________________________________

Atom x y z Ueq(Å2)

_________________________________________________________________

Rh(1) 8358(1) 8591(1) 2877(1) 37(1)

Rh(2) 7608(1) 9042(1) 1159(1) 41(1)

N(1) 6863(3) 7726(1) 2243(2) 60(1)

N(2) 5948(3) 8226(1) 741(2) 44(1)

N(3) 6570(3) 9164(1) 3234(2) 43(1)

N(4) 6152(3) 9696(1) 1752(2) 49(1)

N(5) 9649(3) 9540(1) 3202(2) 51(1)

N(6) 9096(3) 9910(1) 1581(2) 45(1)

N(7) 10162(3) 8037(1) 2528(2) 51(1)

N(8) 9252(3) 8348(1) 859(2) 57(1)

O(1) 2818(3) 7861(1) 3969(2) 71(1)

O(2) 3805(3) 7457(1) 3188(3) 88(1)

O(3) 3062(3) 6651(1) 3412(2) 78(1)

O(4) 1781(3) 7107(2) 4171(2) 89(1)

C(1) 7432(4) 8030(2) 2528(3) 48(1)

C(2A) 6003(4) 7404(2) 1871(4) 44(2)

C(3A) 5858(5) 7390(2) 998(4) 41(2)

C(2B) 6348(4) 7320(2) 1778(5) 43(3)

C(3B) 5314(5) 7544(3) 1333(3) 64(4)

C(4) 5273(4) 7814(2) 595(2) 54(1)

C(5) 6554(3) 8527(2) 890(2) 41(1)

C(6) 7225(3) 8938(1) 3114(2) 36(1)

C(7) 5848(3) 9511(2) 3351(3) 50(1)

C(8) 5936(4) 9987(2) 2979(3) 57(1)

C(9) 5523(4) 9984(2) 2102(3) 67(2)

C(10) 6646(4) 9455(2) 1495(2) 45(1)

C(11) 9206(3) 9179(2) 3120(2) 40(1)

C(12A) 10023(5) 10033(1) 3323(4) 39(2)

C(13A) 10492(4) 10192(2) 2705(2) 38(2)

C(12B) 10459(8) 9896(2) 3340(5) 51(3)

C(13B) 9918(9) 10294(3) 2800(2) 58(4)

C(14) 9718(3) 10315(2) 1937(2) 58(1)

C(15) 8578(3) 9577(2) 1395(2) 43(1)

C(16) 9508(4) 8241(2) 2670(3) 46(1)

C(17) 10847(4) 7773(2) 2203(3) 58(1)

C(18) 10289(4) 7625(2) 1390(3) 61(1)

C(19) 10062(4) 8019(2) 791(3) 65(1)

C(20) 8631(4) 8612(2) 926(3) 50(1)

C(21) 3342(2) 8133(1) 4584(2) 59(2)

C(22) 3009(2) 8162(1) 5234(2) 59(2)

C(23) 3540(3) 8451(1) 5853(2) 72(2)

C(24) 4405(3) 8712(1) 5822(2) 72(1)

C(25) 4738(2) 8683(1) 5172(2) 75(1)

C(26) 4206(2) 8394(1) 4553(2) 71(2)

C(27) 4565(5) 8367(2) 3845(4) 97(2)

C(28) 4833(2) 7503(1) 3509(2) 72(2)

C(29) 5242(3) 7935(1) 3851(2) 85(2)

C(30) 6305(3) 7978(2) 4224(3) 111(3)

C(31) 6960(2) 7588(2) 4255(3) 118(3)

C(32) 6551(3) 7155(2) 3913(3) 90(2)

C(33) 5487(3) 7113(1) 3540(2) 69(2)

C(34) 5065(4) 6646(2) 3169(3) 72(2)

C(35) 3789(2) 6346(1) 3819(1) 56(1)

C(36) 4766(2) 6304(1) 3720(2) 55(1)

C(37) 5464(2) 5960(1) 4133(2) 73(2)

C(38) 5185(3) 5658(1) 4645(2) 79(2)

C(39) 4207(3) 5700(1) 4744(2) 76(2)

C(40) 3509(2) 6044(1) 4331(2) 66(2)

C(41) 2493(5) 6126(2) 4516(4) 90(2)

C(42) 2254(2) 6996(1) 4913(2) 68(2)

C(43) 2578(3) 6528(1) 5124(2) 78(2)

C(44) 3052(3) 6415(1) 5897(2) 94(2)

C(45) 3201(3) 6769(2) 6460(2) 92(2)

C(46) 2877(3) 7236(1) 6248(2) 79(2)

C(47) 2403(3) 7350(1) 5475(2) 69(2)

C(48) 2099(4) 7870(2) 5274(4) 75(2)

O(5) 12639(5) 3929(3) 7053(4) 69(2)

O(6) 13610(5) 4646(3) 7819(5) 77(2)

O(7) 13132(5) 4261(2) 8920(4) 63(2)

O(8) 12439(6) 3418(3) 8351(6) 99(3)

C(49) 11765(3) 4029(2) 6471(3) 49(1)

C(50) 10964(4) 3693(2) 6296(3) 55(1)

C(51) 10076(4) 3767(2) 5670(3) 65(3)

C(52) 9989(4) 4178(3) 5219(3) 70(3)

C(53) 10790(5) 4513(2) 5395(3) 57(3)

C(54) 11678(4) 4439(2) 6021(3) 48(3)

C(55) 12531(6) 4825(3) 6223(5) 56(2)

C(56) 13047(3) 5064(2) 7653(2) 46(2)

C(57) 12484(4) 5154(2) 6885(2) 50(2)

C(58) 11847(4) 5557(2) 6695(2) 61(3)

C(59) 11773(5) 5869(2) 7271(3) 66(3)

C(60) 12336(5) 5779(2) 8039(3) 48(1)

C(61) 12973(4) 5377(2) 8229(2) 49(3)

C(62) 13548(4) 5264(3) 9059(3) 65(3)

C(63) 12704(3) 4512(2) 9372(2) 53(3)

C(64) 12913(4) 5000(2) 9476(3) 61(3)

C(65) 12477(5) 5267(2) 9944(4) 66(3)

C(66) 11832(5) 5045(2) 10308(4) 59(3)

C(67) 11622(4) 4557(2) 10204(3) 55(3)

C(68) 12058(4) 4290(2) 9736(3) 57(3)

C(69) 11816(9) 3759(4) 9645(6) 68(3)

C(70) 11389(3) 3489(2) 8240(3) 67(3)

C(71) 11049(4) 3636(2) 8852(3) 61(3)

C(72) 9988(4) 3678(2) 8751(4) 59(3)

C(73) 9268(3) 3573(2) 8038(4) 50(3)

C(74) 9609(4) 3426(2) 7426(3) 55(3)

C(75) 10670(4) 3384(2) 7527(3) 46(3)

C(76) 11055(7) 3254(3) 6850(6) 61(3)

O(9) 12687(5) 3852(3) 7612(5) 62(2)

O(10) 13813(6) 4531(3) 8366(4) 66(2)

O(11) 13053(6) 4211(3) 9534(7) 90(3)

O(12) 12113(6) 3507(3) 8734(5) 77(3)

C(77) 11959(3) 3929(2) 6919(2) 47(3)

C(78) 11107(4) 3623(2) 6678(3) 38(2)

C(79) 10349(4) 3698(2) 5971(3) 43(3)

C(80) 10443(4) 4080(2) 5505(2) 59(3)

C(81) 11294(5) 4387(2) 5746(3) 47(3)

C(82) 12052(4) 4311(2) 6454(3) 47(3)

C(83) 12977(8) 4656(4) 6729(6) 57(3)

C(84) 13314(4) 4934(2) 8099(3) 54(3)

C(85) 12887(5) 5019(2) 7311(3) 44(3)

C(86) 12389(6) 5452(2) 7053(4) 68(4)

C(87) 12318(6) 5800(2) 7583(5) 68(4)

C(88) 12745(6) 5715(2) 8371(4) 59(3)

C(89) 13243(5) 5282(2) 8629(3) 58(3)

C(90) 13633(10) 5172(5) 9490(7) 71(4)

C(91) 12468(4) 4540(2) 9749(3) 55(3)

C(92) 12743(5) 5022(2) 9800(4) 54(3)

C(93) 12172(6) 5353(2) 10076(4) 61(4)

C(94) 11327(6) 5202(2) 10299(4) 66(3)

C(95) 11052(5) 4719(2) 10248(4) 57(3)

C(96) 11623(5) 4388(2) 9973(4) 49(3)

C(97) 11258(9) 3862(3) 9918(6) 53(3)

C(98) 11060(3) 3535(2) 8555(2) 50(3)

C(99) 10626(4) 3710(2) 9103(2) 49(3)

C(100) 9552(4) 3762(2) 8916(3) 44(3)

C(101) 8912(3) 3639(2) 8182(3) 51(3)

C(102) 9346(3) 3464(3) 7635(3) 42(3)

C(103) 10420(3) 3412(2) 7821(2) 43(3)

C(104) 10880(5) 3254(2) 7208(3) 56(3) _________________________________________________________________

**Table S11.** Anisotropic displacement parameters (Å2x103) for [Rh2(diprop)4][Calix]2 (**4**) at 90K.

_______________________________________________________________________

Atom U11 U22 U33 U23 U13 U12

_______________________________________________________________________

Rh(1) 45(1) 31(1) 39(1) -2(1) 18(1) -8(1)

Rh(2) 50(1) 36(1) 42(1) 0(1) 23(1) -4(1)

N(1) 84(3) 39(2) 48(2) 4(2) 9(2) -28(2)

N(2) 49(2) 36(2) 47(2) -3(2) 16(2) 1(2)

N(3) 40(2) 46(2) 44(2) 8(2) 16(2) -6(2)

N(4) 63(2) 45(2) 44(2) 10(2) 23(2) 12(2)

N(5) 66(2) 48(2) 41(2) -3(2) 18(2) -27(2)

N(6) 52(2) 43(2) 45(2) 2(2) 21(2) -8(2)

N(7) 61(2) 36(2) 63(2) 1(2) 31(2) 2(2)

N(8) 71(2) 43(2) 70(2) 2(2) 43(2) 1(2)

O(1) 71(2) 58(2) 74(2) -8(2) 9(2) -9(2)

O(2) 102(3) 63(2) 101(3) 13(2) 34(2) 4(2)

O(3) 64(2) 67(2) 98(3) 15(2) 17(2) 2(2)

O(4) 103(3) 72(2) 91(3) -26(2) 27(2) -32(2)

C(1) 66(3) 37(2) 43(2) 6(2) 21(2) -1(2)

C(4) 55(3) 46(3) 56(3) -11(2) 11(2) -17(2)

C(5) 57(2) 38(2) 34(2) -1(2) 21(2) 6(2)

C(6) 42(2) 36(2) 30(2) 7(2) 10(2) -10(2)

C(7) 44(2) 64(3) 48(2) 8(2) 22(2) 11(2)

C(8) 68(3) 51(3) 61(3) 0(2) 33(2) 14(2)

C(9) 86(3) 63(3) 62(3) 15(2) 38(2) 33(3)

C(10) 59(2) 36(2) 42(2) 8(2) 20(2) 2(2)

C(11) 46(2) 43(2) 32(2) -1(2) 17(2) -1(2)

C(14) 74(3) 45(3) 65(3) -3(2) 36(2) -22(2)

C(15) 56(2) 43(2) 38(2) 6(2) 25(2) 3(2)

C(16) 57(2) 30(2) 55(3) 1(2) 22(2) -4(2)

C(17) 65(3) 41(3) 78(3) -1(2) 39(2) -1(2)

C(18) 82(3) 35(2) 82(3) 3(2) 51(2) 2(2)

C(19) 87(3) 42(3) 89(3) 2(2) 60(2) 12(2)

C(20) 64(2) 41(2) 54(2) -2(2) 32(2) -5(2)

C(21) 56(3) 39(3) 76(3) -3(2) 9(3) 5(2)

C(22) 48(3) 48(3) 73(3) -7(3) 6(2) -1(2)

C(23) 76(3) 53(3) 75(4) -8(3) 8(3) 17(3)

C(24) 70(2) 62(2) 76(2) -2(1) 10(1) 3(1)

C(25) 73(2) 67(2) 81(2) 1(1) 16(1) -1(1)

C(26) 63(3) 32(2) 109(4) 13(3) 13(3) 2(2)

C(27) 120(5) 46(3) 138(5) 32(3) 60(4) -5(3)

C(28) 88(3) 64(3) 77(3) 14(3) 44(3) -12(3)

C(29) 102(4) 65(3) 108(4) 23(3) 60(3) -19(3)

C(30) 105(4) 78(4) 165(6) 9(4) 64(4) -39(4)

C(31) 85(4) 116(6) 175(7) -14(5) 71(4) -44(4)

C(32) 83(3) 92(5) 120(4) -2(4) 68(3) -8(3)

C(33) 85(3) 66(3) 75(3) 4(3) 53(2) -8(3)

C(34) 86(3) 79(4) 63(3) -4(3) 43(2) 6(3)

C(35) 68(3) 43(3) 54(3) -4(2) 13(2) -11(2)

C(36) 74(3) 47(3) 46(2) -13(2) 18(2) 0(2)

C(37) 76(3) 61(3) 68(3) -26(3) 0(3) 19(3)

C(38) 119(5) 37(3) 56(3) -15(2) -10(3) 17(3)

C(39) 132(5) 35(3) 57(3) -10(2) 23(3) -15(3)

C(40) 89(4) 37(3) 70(3) -10(2) 20(3) -18(3)

C(41) 117(4) 56(3) 118(4) -22(3) 68(3) -45(3)

C(42) 70(3) 50(3) 101(4) -2(3) 50(3) -17(2)

C(43) 88(3) 72(4) 97(3) -4(3) 63(3) -33(3)

C(44) 121(4) 66(4) 123(4) 16(3) 81(3) -25(3)

C(45) 121(4) 100(5) 83(3) 17(3) 72(3) 10(4)

C(46) 73(3) 74(4) 108(4) 5(3) 56(3) -7(3)

C(47) 59(3) 75(4) 86(3) 3(3) 42(2) -15(3)

C(48) 64(3) 68(3) 103(4) -24(3) 38(3) -4(3)

O(5) 48(3) 75(5) 92(5) -8(4) 33(3) 7(3)

O(6) 53(4) 86(5) 83(5) -28(4) 11(4) 14(4)

O(7) 51(4) 55(4) 74(4) 1(4) 5(3) 1(3)

O(8) 63(4) 103(6) 142(7) -28(6) 46(4) 7(4)

C(49) 49(2) 50(2) 50(2) -3(1) 16(1) 0(1)

C(50) 55(2) 55(2) 55(2) -1(1) 18(1) 0(1)

C(51) 92(6) 65(6) 58(5) -9(5) 52(4) -25(5)

C(52) 63(6) 115(8) 37(5) -39(5) 21(4) -36(6)

C(53) 75(6) 66(6) 34(4) -8(4) 24(4) -15(5)

C(54) 36(4) 68(6) 47(5) -23(4) 24(4) -12(4)

C(55) 56(4) 65(6) 64(5) -21(4) 45(4) -28(4)

C(56) 43(4) 55(5) 48(5) -21(4) 25(4) -19(4)

C(57) 47(4) 46(5) 73(5) -6(4) 42(4) -21(4)

C(58) 105(7) 36(5) 51(5) 2(4) 36(5) -13(5)

C(59) 98(7) 36(5) 71(6) 0(5) 37(6) -10(5)

C(60) 49(2) 47(2) 47(2) -1(1) 15(1) -1(1)

C(61) 43(4) 48(5) 58(5) 0(4) 16(4) -17(4)

C(62) 47(5) 78(7) 65(7) -6(6) 12(5) -29(5)

C(63) 45(5) 76(7) 38(5) -9(5) 12(4) -7(5)

C(64) 47(5) 82(7) 53(6) -21(5) 13(5) -12(5)

C(65) 67(6) 57(6) 77(7) -11(5) 26(5) -27(5)

C(66) 59(6) 72(7) 45(5) -8(5) 13(4) -3(5)

C(67) 52(5) 80(7) 34(5) 13(5) 13(4) 8(5)

C(68) 47(5) 61(6) 51(6) 19(5) -1(5) -2(5)

C(69) 63(6) 66(6) 62(6) 25(5) 0(5) 10(5)

C(70) 73(6) 34(5) 112(7) 29(5) 53(5) 18(4)

C(71) 67(6) 24(4) 88(7) 19(5) 17(6) 4(4)

C(72) 78(6) 47(5) 69(5) 18(4) 47(5) 14(5)

C(73) 57(5) 31(4) 55(6) -7(4) 10(5) -4(4)

C(74) 65(6) 23(4) 81(7) 1(4) 27(5) -3(4)

C(75) 62(5) 28(4) 63(5) 14(4) 39(4) -3(4)

C(76) 56(5) 37(5) 101(7) -35(5) 41(5) -5(4)

O(9) 45(4) 58(4) 76(5) 20(4) 10(4) -2(3)

O(10) 71(4) 59(4) 72(5) 12(4) 30(4) 14(4)

O(11) 50(4) 53(5) 163(9) 10(6) 30(5) 4(4)

O(12) 43(4) 117(7) 71(5) 2(5) 18(4) -7(4)

C(77) 37(4) 46(5) 61(6) 12(4) 18(4) 20(4)

C(78) 45(4) 28(4) 47(5) -5(4) 21(4) 2(4)

C(79) 53(5) 46(5) 32(4) -18(4) 16(4) 6(4)

C(80) 70(6) 85(8) 23(5) 1(5) 16(5) 18(6)

C(81) 70(6) 49(6) 29(4) 5(4) 25(4) -9(5)

C(82) 33(4) 59(6) 57(5) 7(5) 26(4) 8(4)

C(83) 60(5) 68(7) 51(5) 13(5) 29(4) -3(5)

C(84) 45(5) 56(6) 71(6) 22(5) 32(4) -9(5)

C(85) 38(5) 38(5) 64(6) 6(5) 26(4) -3(4)

C(86) 71(7) 67(7) 67(7) 30(6) 22(6) -15(6)

C(87) 84(8) 31(5) 87(8) 10(5) 21(7) -12(5)

C(88) 45(5) 27(5) 97(8) 3(5) 8(5) -9(4)

C(89) 51(6) 37(5) 87(8) 4(6) 25(6) -3(5)

C(90) 69(7) 62(7) 64(8) -8(6) -4(6) -9(6)

C(91) 61(6) 39(5) 61(7) -4(5) 11(5) 2(5)

C(92) 58(6) 40(6) 56(7) -13(5) 6(5) -8(5)

C(93) 85(8) 50(6) 37(5) -9(5) 2(6) -18(6)

C(94) 104(8) 51(6) 49(6) -9(5) 34(6) -6(6)

C(95) 85(7) 46(6) 46(5) -14(4) 29(5) -16(5)

C(96) 64(7) 43(6) 36(5) -4(5) 7(5) -6(5)

C(97) 69(6) 41(5) 49(5) 9(4) 20(5) 3(5)

C(98) 47(6) 47(6) 51(6) 9(5) 6(5) -20(5)

C(99) 58(6) 38(5) 55(6) 13(4) 23(5) -1(5)

C(100) 65(6) 35(5) 37(5) -2(4) 22(4) -19(4)

C(101) 50(5) 41(6) 67(6) 6(5) 27(5) -2(5)

C(102) 61(6) 24(5) 37(5) -8(4) 9(5) -21(4)

C(103) 61(5) 40(5) 40(5) 0(4) 32(4) -22(4)

C(104) 65(6) 68(7) 50(5) -9(5) 41(5) -21(5) _______________________________________________________________________

**Table S12.** Selected Bond Lengths (Å) and Angles () for [Rh2(diprop)4][Calix]2 (**4**) at 90K.

________________________________________________________________________

Rh(1)-C(6) 1.966(4)

Rh(1)-C(16) 1.966(5)

Rh(1)-C(11) 1.969(4)

Rh(1)-C(1) 1.979(5)

Rh(2)-C(15) 1.943(4)

Rh(2)-C(10) 1.967(5)

Rh(2)-C(20) 1.969(5)

Rh(2)-C(5) 1.971(4)

N(1)-C(1) 1.154(5)

N(1)-C(2B) 1.453(4)

N(1)-C(2A) 1.457(4)

N(2)-C(5) 1.145(5)

N(2)-C(4) 1.437(5)

N(3)-C(6) 1.159(5)

N(3)-C(7) 1.433(6)

N(4)-C(10) 1.143(6)

N(4)-C(9) 1.449(6)

N(5)-C(11) 1.156(5)

N(5)-C(12B) 1.44(1)

N(5)-C(12A) 1.457(4)

N(6)-C(15) 1.148(5)

N(6)-C(14) 1.436(5)

N(7)-C(16) 1.142(6)

N(7)-C(17) 1.444(6)

N(8)-C(20) 1.150(6)

N(8)-C(19) 1.459(6)

O(1)-C(21) 1.355(4)

O(2)-C(28) 1.334(5)

O(3)-C(35) 1.335(4)

O(4)-C(42) 1.338(5)

C(2A)-C(3A) 1.540(9)

C(3A)-C(4) 1.481(8)

C(2B)-C(3B) 1.514(5)

C(3B)-C(4) 1.524(5)

C(7)-C(8) 1.512(7)

C(8)-C(9) 1.518(7)

C(12A)-C(13A) 1.517(8)

C(13A)-C(14) 1.503(4)

C(12B)-C(13B) 1.511(5)

C(13B)-C(14) 1.509(4)

C(17)-C(18) 1.495(7)

C(18)-C(19) 1.510(7)

C(21)-C(22) 1.3900

C(21)-C(26) 1.3900

C(22)-C(23) 1.3900

C(22)-C(48) 1.492(6)

C(23)-C(24) 1.3900

C(24)-C(25) 1.3900

C(25)-C(26) 1.3900

C(26)-C(27) 1.511(8)

C(27)-C(29) 1.508(7)

C(28)-C(29) 1.3900

C(28)-C(33) 1.3900

C(29)-C(30) 1.3900

C(30)-C(31) 1.3900

C(31)-C(32) 1.3900

C(32)-C(33) 1.3900

C(33)-C(34) 1.495(6)

C(34)-C(36) 1.524(6)

C(35)-C(36) 1.3900

C(35)-C(40) 1.3900

C(36)-C(37) 1.3900

C(37)-C(38) 1.3900

C(38)-C(39) 1.3900

C(39)-C(40) 1.3900

C(40)-C(41) 1.526(7)

C(41)-C(43) 1.553(7)

C(42)-C(43) 1.3900

C(42)-C(47) 1.3900

C(43)-C(44) 1.3900

C(44)-C(45) 1.3900

C(45)-C(46) 1.3900

C(46)-C(47) 1.3900

C(47)-C(48) 1.518(6)

O(5)-C(49) 1.347(8)

O(6)-C(56) 1.373(9)

O(7)-C(63) 1.337(9)

O(8)-C(70) 1.382(9)

C(49)-C(50) 1.3900

C(49)-C(54) 1.3900

C(50)-C(51) 1.3900

C(50)-C(76) 1.56(1)

C(51)-C(52) 1.3900

C(52)-C(53) 1.3900

C(53)-C(54) 1.3900

C(54)-C(55) 1.54(1)

C(55)-C(57) 1.53(1)

C(56)-C(57) 1.3900

C(56)-C(61) 1.3900

C(57)-C(58) 1.3900

C(58)-C(59) 1.3900

C(59)-C(60) 1.3900

C(60)-C(61) 1.3900

C(61)-C(62) 1.501(4)

C(62)-C(64) 1.500(4)

C(63)-C(64) 1.3900

C(63)-C(68) 1.3900

C(64)-C(65) 1.3900

C(65)-C(66) 1.3900

C(66)-C(67) 1.3900

C(67)-C(68) 1.3900

C(68)-C(69) 1.51(1)

C(69)-C(71) 1.53(1)

C(70)-C(71) 1.3900

C(70)-C(75) 1.3900

C(71)-C(72) 1.3900

C(72)-C(73) 1.3900

C(73)-C(74) 1.3900

C(74)-C(75) 1.3900

C(75)-C(76) 1.52(1)

O(9)-C(77) 1.354(8)

O(10)-C(84) 1.322(9)

O(11)-C(91) 1.34(1)

O(12)-C(98) 1.359(8)

C(77)-C(78) 1.3900

C(77)-C(82) 1.3900

C(78)-C(79) 1.3900

C(78)-C(104) 1.503(4)

C(79)-C(80) 1.3900

C(80)-C(81) 1.3900

C(81)-C(82) 1.3900

C(82)-C(83) 1.53(1)

C(83)-C(85) 1.50(1)

C(84)-C(85) 1.3900

C(84)-C(89) 1.3900

C(85)-C(86) 1.3900

C(86)-C(87) 1.3900

C(87)-C(88) 1.3900

C(88)-C(89) 1.3900

C(89)-C(90) 1.52(1)

C(90)-C(92) 1.53(2)

C(91)-C(92) 1.3900

C(91)-C(96) 1.3900

C(92)-C(93) 1.3900

C(93)-C(94) 1.3900

C(94)-C(95) 1.3900

C(95)-C(96) 1.3900

C(96)-C(97) 1.54(1)

C(97)-C(99) 1.53(1)

C(98)-C(99) 1.3900

C(98)-C(103) 1.3900

C(99)-C(100) 1.3900

C(100)-C(101) 1.3900

C(101)-C(102) 1.3900

C(102)-C(103) 1.3900

C(103)-C(104) 1.500(4)

________________________________________________________________________

________________________________________________________________________

C(6)-Rh(1)-C(16) 178.5(2)

C(6)-Rh(1)-C(11) 88.8(2)

C(16)-Rh(1)-C(11) 90.9(2)

C(6)-Rh(1)-C(1) 90.1(2)

C(16)-Rh(1)-C(1) 90.3(2)

C(11)-Rh(1)-C(1) 174.1(2)

C(15)-Rh(2)-C(10) 86.9(2)

C(15)-Rh(2)-C(20) 92.6(2)

C(10)-Rh(2)-C(20) 174.7(2)

C(15)-Rh(2)-C(5) 176.4(2)

C(10)-Rh(2)-C(5) 90.5(2)

C(20)-Rh(2)-C(5) 90.3(2)

C(1)-N(1)-C(2B) 165.0(5)

C(1)-N(1)-C(2A) 169.9(5)

C(5)-N(2)-C(4) 174.1(4)

C(6)-N(3)-C(7) 170.5(4)

C(10)-N(4)-C(9) 177.4(5)

C(11)-N(5)-C(12B) 163.1(5)

C(11)-N(5)-C(12A) 168.9(5)

C(15)-N(6)-C(14) 170.3(4)

C(16)-N(7)-C(17) 169.0(4)

C(20)-N(8)-C(19) 178.5(5)

N(1)-C(1)-Rh(1) 172.2(4)

N(1)-C(2A)-C(3A) 108.9(5)

C(4)-C(3A)-C(2A) 111.6(5)

N(1)-C(2B)-C(3B) 100.8(4)

C(2B)-C(3B)-C(4) 116.8(6)

N(2)-C(4)-C(3A) 109.5(4)

N(2)-C(4)-C(3B) 112.5(4)

N(2)-C(5)-Rh(2) 179.2(4)

N(3)-C(6)-Rh(1) 176.4(4)

N(3)-C(7)-C(8) 112.0(4)

C(7)-C(8)-C(9) 114.2(4)

N(4)-C(9)-C(8) 113.0(4)

N(4)-C(10)-Rh(2) 174.0(4)

N(5)-C(11)-Rh(1) 174.1(4)

N(5)-C(12A)-C(13A) 111.6(5)

C(14)-C(13A)-C(12A) 115.2(4)

N(5)-C(12B)-C(13B) 101.8(7)

C(14)-C(13B)-C(12B) 126.9(7)

N(6)-C(14)-C(13A) 112.5(4)

N(6)-C(14)-C(13B) 109.2(5)

N(6)-C(15)-Rh(2) 173.3(4)

N(7)-C(16)-Rh(1) 178.2(4)

N(7)-C(17)-C(18) 110.8(4)

C(17)-C(18)-C(19) 116.1(4)

N(8)-C(19)-C(18) 112.7(4)

N(8)-C(20)-Rh(2) 173.8(4)

O(1)-C(21)-C(22) 120.7(3)

O(1)-C(21)-C(26) 119.3(3)

C(22)-C(21)-C(26) 120.0

C(23)-C(22)-C(21) 120.0

C(23)-C(22)-C(48) 120.2(3)

C(21)-C(22)-C(48) 119.8(3)

C(22)-C(23)-C(24) 120.0

C(25)-C(24)-C(23) 120.0

C(24)-C(25)-C(26) 120.0

C(25)-C(26)-C(21) 120.0

C(25)-C(26)-C(27) 119.9(3)

C(21)-C(26)-C(27) 120.1(3)

C(29)-C(27)-C(26) 112.7(4)

O(2)-C(28)-C(29) 119.5(3)

O(2)-C(28)-C(33) 120.4(3)

C(29)-C(28)-C(33) 120.0

C(28)-C(29)-C(30) 120.0

C(28)-C(29)-C(27) 122.2(3)

C(30)-C(29)-C(27) 117.8(3)

C(29)-C(30)-C(31) 120.0

C(32)-C(31)-C(30) 120.0

C(33)-C(32)-C(31) 120.0

C(32)-C(33)-C(28) 120.0

C(32)-C(33)-C(34) 119.2(3)

C(28)-C(33)-C(34) 120.8(3)

C(33)-C(34)-C(36) 112.8(4)

O(3)-C(35)-C(36) 123.0(3)

O(3)-C(35)-C(40) 116.9(3)

C(36)-C(35)-C(40) 120.0

C(35)-C(36)-C(37) 120.0

C(35)-C(36)-C(34) 119.1(3)

C(37)-C(36)-C(34) 120.9(3)

C(38)-C(37)-C(36) 120.0

C(37)-C(38)-C(39) 120.0

C(40)-C(39)-C(38) 120.0

C(39)-C(40)-C(35) 120.0

C(39)-C(40)-C(41) 119.4(3)

C(35)-C(40)-C(41) 120.2(3)

C(40)-C(41)-C(43) 113.0(4)

O(4)-C(42)-C(43) 120.5(3)

O(4)-C(42)-C(47) 119.5(3)

C(43)-C(42)-C(47) 120.0

C(44)-C(43)-C(42) 120.0

C(44)-C(43)-C(41) 117.8(3)

C(42)-C(43)-C(41) 122.1(3)

C(45)-C(44)-C(43) 120.0

C(46)-C(45)-C(44) 120.0

C(47)-C(46)-C(45) 120.0

C(46)-C(47)-C(42) 120.0

C(46)-C(47)-C(48) 117.8(3)

C(42)-C(47)-C(48) 122.2(3)

C(22)-C(48)-C(47) 111.5(4)

O(5)-C(49)-C(50) 118.1(5)

O(5)-C(49)-C(54) 121.7(5)

C(50)-C(49)-C(54) 120.0

C(49)-C(50)-C(51) 120.0

C(49)-C(50)-C(76) 118.5(5)

C(51)-C(50)-C(76) 121.4(5)

C(52)-C(51)-C(50) 120.0

C(53)-C(52)-C(51) 120.0

C(52)-C(53)-C(54) 120.0

C(53)-C(54)-C(49) 120.0

C(53)-C(54)-C(55) 119.0(5)

C(49)-C(54)-C(55) 121.0(5)

C(57)-C(55)-C(54) 113.4(6)

O(6)-C(56)-C(57) 117.9(4)

O(6)-C(56)-C(61) 122.0(4)

C(57)-C(56)-C(61) 120.0

C(58)-C(57)-C(56) 120.0

C(58)-C(57)-C(55) 117.3(4)

C(56)-C(57)-C(55) 122.7(4)

C(57)-C(58)-C(59) 120.0

C(58)-C(59)-C(60) 120.0

C(61)-C(60)-C(59) 120.0

C(60)-C(61)-C(56) 120.0

C(60)-C(61)-C(62) 120.5(4)

C(56)-C(61)-C(62) 119.4(4)

C(64)-C(62)-C(61) 114.3(4)

O(7)-C(63)-C(64) 119.1(4)

O(7)-C(63)-C(68) 120.9(4)

C(64)-C(63)-C(68) 120.0

C(63)-C(64)-C(65) 120.0

C(63)-C(64)-C(62) 122.4(5)

C(65)-C(64)-C(62) 117.5(5)

C(64)-C(65)-C(66) 120.0

C(67)-C(66)-C(65) 120.0

C(66)-C(67)-C(68) 120.0

C(67)-C(68)-C(63) 120.0

C(67)-C(68)-C(69) 118.2(6)

C(63)-C(68)-C(69) 121.8(6)

C(68)-C(69)-C(71) 112.5(7)

O(8)-C(70)-C(71) 120.2(5)

O(8)-C(70)-C(75) 119.7(5)

C(71)-C(70)-C(75) 120.0

C(72)-C(71)-C(70) 120.0

C(72)-C(71)-C(69) 118.3(6)

C(70)-C(71)-C(69) 121.7(6)

C(73)-C(72)-C(71) 120.0

C(72)-C(73)-C(74) 120.0

C(75)-C(74)-C(73) 120.0

C(74)-C(75)-C(70) 120.0

C(74)-C(75)-C(76) 120.5(4)

C(70)-C(75)-C(76) 119.3(4)

C(75)-C(76)-C(50) 110.9(6)

O(9)-C(77)-C(78) 119.2(4)

O(9)-C(77)-C(82) 120.8(4)

C(78)-C(77)-C(82) 120.0

C(77)-C(78)-C(79) 120.0

C(77)-C(78)-C(104) 122.0(4)

C(79)-C(78)-C(104) 117.3(4)

C(80)-C(79)-C(78) 120.0

C(79)-C(80)-C(81) 120.0

C(82)-C(81)-C(80) 120.0

C(81)-C(82)-C(77) 120.0

C(81)-C(82)-C(83) 120.0(5)

C(77)-C(82)-C(83) 119.9(5)

C(85)-C(83)-C(82) 114.8(7)

O(10)-C(84)-C(85) 121.6(5)

O(10)-C(84)-C(89) 118.3(5)

C(85)-C(84)-C(89) 120.0

C(86)-C(85)-C(84) 120.0

C(86)-C(85)-C(83) 119.0(5)

C(84)-C(85)-C(83) 121.0(5)

C(87)-C(86)-C(85) 120.0

C(86)-C(87)-C(88) 120.0

C(89)-C(88)-C(87) 120.0

C(88)-C(89)-C(84) 120.0

C(88)-C(89)-C(90) 120.0(6)

C(84)-C(89)-C(90) 119.8(6)

C(89)-C(90)-C(92) 111.9(8)

O(11)-C(91)-C(92) 120.7(5)

O(11)-C(91)-C(96) 119.2(5)

C(92)-C(91)-C(96) 120.0

C(91)-C(92)-C(93) 120.0

C(91)-C(92)-C(90) 117.5(6)

C(93)-C(92)-C(90) 122.4(6)

C(92)-C(93)-C(94) 120.0

C(95)-C(94)-C(93) 120.0

C(96)-C(95)-C(94) 120.0

C(95)-C(96)-C(91) 120.0

C(95)-C(96)-C(97) 117.0(6)

C(91)-C(96)-C(97) 123.0(6)

C(99)-C(97)-C(96) 113.5(7)

O(12)-C(98)-C(99) 119.3(5)

O(12)-C(98)-C(103) 120.6(4)

C(99)-C(98)-C(103) 120.0

C(98)-C(99)-C(100) 120.0

C(98)-C(99)-C(97) 124.1(5)

C(100)-C(99)-C(97) 115.9(5)

C(101)-C(100)-C(99) 120.0

C(102)-C(101)-C(100) 120.0

C(103)-C(102)-C(101) 120.0

C(102)-C(103)-C(98) 120.0

C(102)-C(103)-C(104) 119.3(3)

C(98)-C(103)-C(104) 120.6(3)

C(103)-C(104)-C(78) 119.3(5)

________________________________________________________________________

**Table S13.** Atomic Fractional Coordinates and Isotropic Thermal Parameters for [Rh2(dihex)4][PF6] (**5**) at 90K.

_________________________________________________________________

Atom x y z Ueq(Å2)

_________________________________________________________________

Rh(1) 4158(1) 842(1) 2500 17(1)

P(1) 4355(3) 1913(3) 5000 29(1)

F(1) 4360(9) 693(7) 5000 55(2)

F(2) 4354(5) 1914(5) 4394(2) 44(2)

F(3) 4391(8) 3154(9) 5000 60(3)

F(4) 3152(6) 1924(7) 5000 39(2)

F(5) 5583(7) 1882(9) 5000 50(2)

P(2) 0 0 3092(1) 26(1)

F(6) 0 0 3700(2) 32(1)

F(7) 0 0 2476(2) 31(1)

F(8A) 302(4) -1191(3) 3071(2) 35(1)

F(8B) 902(8) -829(7) 3138(4) 36(2)

N(1) 2535(3) -781(2) 2163(1) 24(1)

N(2A) 3678(5) 267(5) 3628(2) 31(1)

C(6A) 3402(5) -79(6) 4132(3) 35(1)

C(7A) 2446(6) -748(6) 4128(3) 38(2)

C(8A) 2511(6) -1680(5) 3765(3) 32(1)

N(2B) 3250(9) 426(11) 3562(3) 21(2)

C(6B) 2735(10) 106(11) 4028(4) 27(3)

C(7B) 3174(11) -892(10) 4213(5) 26(3)

C(8B) 2977(11) -1798(10) 3838(5) 24(3)

C(1) 3132(3) -169(3) 2278(2) 22(1)

C(2) 3777(4) 518(3) 3210(2) 32(1)

C(3) 1819(3) -1568(3) 2017(2) 30(1)

C(4) 1580(4) -1518(5) 1452(2) 43(1)

C(5) 2544(5) -1516(5) 1116(2) 50(1) _________________________________________________________________

**Table S14.** Anisotropic displacement parameters (Å2x103) for [Rh2(dihex)4][PF6] (**5**) at 90K.

_______________________________________________________________________

Atom U11 U22 U33 U23 U13 U12

_______________________________________________________________________

Rh(1) 11(1) 11(1) 29(1) 0(1) 0(1) -1(1)

P(1) 26(2) 41(2) 19(1) 0 0 1(1)

F(1) 80(7) 40(5) 44(5) 0 0 12(5)

F(2) 38(3) 71(4) 23(2) 10(3) -2(2) -6(3)

F(3) 59(6) 60(6) 62(6) 0 0 6(5)

F(4) 30(4) 53(5) 33(4) 0 0 2(3)

F(5) 33(4) 92(8) 23(4) 0 0 2(5)

P(2) 24(1) 24(1) 29(1) 0 0 0

F(6) 35(2) 35(2) 27(2) 0 0 0

F(7) 33(2) 33(2) 28(2) 0 0 0

F(8A) 48(2) 22(2) 35(2) 1(2) 4(2) 5(2)

F(8B) 39(5) 28(5) 40(5) 3(4) 6(4) 11(4)

N(1) 20(2) 19(2) 34(2) -2(1) 1(1) -1(1)

N(2A) 31(3) 27(3) 34(3) 1(2) -9(3) 3(3)

N(2B) 24(6) 22(6) 16(5) 3(4) -6(5) -11(5)

C(1) 15(2) 18(2) 33(2) 0(2) 1(1) 2(1)

C(2) 37(2) 22(2) 37(2) -3(2) 0(2) -9(2)

C(3) 25(2) 24(2) 42(2) -6(2) 3(2) -8(2)

C(4) 35(3) 51(3) 42(3) 2(2) -10(2) -22(2)

C(5) 48(2) 56(2) 45(2) -1(2) -1(2) -14(2)

**Table S15.** Selected Bond Lengths (Å) and Angles () for [Rh2(dihex)4][PF6] (**5**) at 90K.

________________________________________________________________________

Rh(1)-C(1) 1.963(4)

Rh(1)-C(1)#1 1.963(4)

Rh(1)-C(2) 1.977(5)

Rh(1)-C(2)#1 1.977(5)

Rh(1)-Rh(1)#2 3.0989(7)

P(1)-F(4) 1.566(9)

P(1)-F(1) 1.59(1)

P(1)-F(2)#3 1.593(5)

P(1)-F(2) 1.593(5)

P(1)-F(5) 1.598(9)

P(1)-F(3) 1.62(1)

P(2)-F(8B)#4 1.599(9)

P(2)-F(8B)#5 1.599(9)

P(2)-F(8B)#6 1.599(9)

P(2)-F(8B) 1.599(9)

P(2)-F(6) 1.599(5)

P(2)-F(8A)#5 1.599(4)

P(2)-F(8A)#6 1.599(4)

P(2)-F(8A)#4 1.599(4)

P(2)-F(8A) 1.599(4)

P(2)-F(7) 1.619(6)

N(1)-C(1) 1.153(5)

N(1)-C(3) 1.437(5)

N(2A)-C(2) 1.153(8)

N(2A)-C(6A) 1.444(9)

C(6A)-C(7A) 1.52(1)

C(7A)-C(8A) 1.55(1)

C(8A)-C(5)#7 1.650(9)

N(2B)-C(2) 1.156(5)

N(2B)-C(6B) 1.458(5)

C(6B)-C(7B) 1.50(2)

C(7B)-C(8B) 1.56(2)

C(3)-C(4) 1.519(6)

C(4)-C(5) 1.534(8)

C(5)-C(8A)#7 1.650(9)

________________________________________________________________________

________________________________________________________________________

C(1)-Rh(1)-C(1)#1 179.2(2)

C(1)-Rh(1)-C(2) 88.1(2)

C(1)#1-Rh(1)-C(2) 91.9(2)

C(1)-Rh(1)-C(2)#1 91.9(2)

C(1)#1-Rh(1)-C(2)#1 88.1(2)

C(2)-Rh(1)-C(2)#1 176.9(3)

C(1)-Rh(1)-Rh(1)#2 90.4(1)

C(1)#1-Rh(1)-Rh(1)#2 90.4(1)

C(2)-Rh(1)-Rh(1)#2 91.5(1)

C(2)#1-Rh(1)-Rh(1)#2 91.5(1)

F(4)-P(1)-F(1) 90.8(6)

F(4)-P(1)-F(2)#3 89.9(2)

F(1)-P(1)-F(2)#3 90.1(3)

F(4)-P(1)-F(2) 89.9(2)

F(1)-P(1)-F(2) 90.1(3)

F(2)#3-P(1)-F(2) 179.8(6)

F(4)-P(1)-F(5) 179.1(6)

F(1)-P(1)-F(5) 88.4(6)

F(2)#3-P(1)-F(5) 90.1(2)

F(2)-P(1)-F(5) 90.1(2)

F(4)-P(1)-F(3) 91.1(5)

F(1)-P(1)-F(3) 178.1(6)

F(2)#3-P(1)-F(3) 89.9(3)

F(2)-P(1)-F(3) 89.9(3)

F(5)-P(1)-F(3) 89.8(6)

F(8B)#4-P(2)-F(8B)#5 89.67(6)

F(8B)#4-P(2)-F(8B)#6 89.67(6)

F(8B)#5-P(2)-F(8B)#6 171.3(7)

F(8B)#4-P(2)-F(8B) 171.3(7)

F(8B)#5-P(2)-F(8B) 89.67(5)

F(8B)#6-P(2)-F(8B) 89.67(5)

F(8B)#4-P(2)-F(6) 85.6(4)

F(8B)#5-P(2)-F(6) 85.6(4)

F(8B)#6-P(2)-F(6) 85.6(4)

F(8B)-P(2)-F(6) 85.6(4)

F(6)-P(2)-F(8A)#5 91.9(2)

F(6)-P(2)-F(8A)#6 91.9(2)

F(8A)#5-P(2)-F(8A)#6 176.1(3)

F(6)-P(2)-F(8A)#4 91.9(2)

F(8A)#5-P(2)-F(8A)#4 89.94(1)

F(8A)#6-P(2)-F(8A)#4 89.94(1)

F(6)-P(2)-F(8A) 91.9(2)

F(8A)#5-P(2)-F(8A) 89.93(1)

F(8A)#6-P(2)-F(8A) 89.94(1)

F(8A)#4-P(2)-F(8A) 176.1(3)

F(8B)#4-P(2)-F(7) 94.4(4)

F(8B)#5-P(2)-F(7) 94.4(4)

F(8B)#6-P(2)-F(7) 94.4(4)

F(8B)-P(2)-F(7) 94.4(4)

F(6)-P(2)-F(7) 180.000(1)

F(8A)#5-P(2)-F(7) 88.1(2)

F(8A)#6-P(2)-F(7) 88.1(2)

F(8A)#4-P(2)-F(7) 88.1(2)

F(8A)-P(2)-F(7) 88.1(2)

C(1)-N(1)-C(3) 178.1(4)

C(2)-N(2A)-C(6A) 171.7(7)

N(2A)-C(6A)-C(7A) 112.1(6)

C(6A)-C(7A)-C(8A) 114.1(6)

C(7A)-C(8A)-C(5)#7 113.9(6)

C(2)-N(2B)-C(6B) 167(1)

N(2B)-C(6B)-C(7B) 110(1)

C(6B)-C(7B)-C(8B) 113(1)

C(5)#7-C(8B)-C(7B) 115(1)

N(1)-C(1)-Rh(1) 177.7(4)

N(2A)-C(2)-Rh(1) 171.0(5)

N(2B)-C(2)-Rh(1) 157.7(8)

N(1)-C(3)-C(4) 111.3(4)

C(3)-C(4)-C(5) 113.3(4)

C(8B)#7-C(5)-C(4) 125.3(9)

C(4)-C(5)-C(8A)#7 113.0(5)

________________________________________________________________________

Symmetry transformations used to generate equivalent atoms:

#1 -y+1/2,-x+1/2,-z+1/2 #2 -x+1,-y,z #3 x,y,-z+1 #4 -x,-y,z

#5 y,-x,z #6 -y,x,z #7 y+1/2,x-1/2,-z+1/2

**Table S16.** Atomic Fractional Coordinates and Isotropic Thermal Parameters for [Rh2(dihex)4][Calix]2·0.5C2H5OH (**6**) at 16K.

_________________________________________________________________

Atom x y z Ueq(Å2)

_________________________________________________________________

Rh(2) 5115(1) 6277(1) 76(1) 13(1)

Rh(1) 3983(1) 7336(1) 350(1) 16(1)

O(1) 5280(1) 8908(1) 1987(1) 21(1)

O(2) 4904(1) 7726(1) 2206(1) 25(1)

O(3) 3425(1) 7887(1) 2003(1) 23(1)

O(4) 4106(1) 9024(1) 1758(1) 21(1)

O(5) 3889(1) 4501(1) 1376(1) 23(1)

O(6) 4566(1) 3277(1) 1065(1) 38(1)

O(7) 3272(2) 3091(1) 882(1) 42(1)

O(8) 2725(1) 4110(1) 1134(1) 36(1)

N(1) 2799(2) 7382(2) -115(1) 33(1)

N(2) 5028(1) 7286(2) -457(1) 21(1)

N(3) 4621(1) 8692(2) 74(1) 25(1)

N(4) 6272(1) 7208(1) 364(1) 21(1)

N(5) 4886(1) 7577(1) 913(1) 14(1)

N(6) 5045(1) 5316(1) 630(1) 17(1)

N(7) 3322(1) 5954(2) 591(1) 20(1)

N(8) 3859(1) 5573(2) -248(1) 25(1)

C(1) 5799(2) 9320(2) 1544(1) 19(1)

C(2) 6303(2) 9241(2) 1334(1) 14(1)

C(3) 6817(2) 8731(2) 1351(1) 21(1)

C(4) 6834(2) 8298(2) 1596(1) 18(1)

C(5) 6331(2) 8369(2) 1813(1) 19(1)

C(6) 5793(2) 8864(2) 1789(1) 16(1)

C(7) 6387(2) 7887(2) 2086(1) 22(1)

C(8) 6006(2) 7186(2) 2053(1) 23(1)

C(9) 6350(2) 6588(2) 1964(1) 18(1)

C(10) 5979(2) 5951(2) 1935(1) 30(1)

C(11) 5265(2) 5910(2) 1987(1) 26(1)

C(12) 4904(2) 6525(2) 2065(1) 17(1)

C(13) 5277(2) 7154(2) 2104(1) 22(1)

C(14) 4099(2) 6527(2) 2099(1) 21(1)

C(15) 3792(2) 6762(2) 1811(1) 23(1)

C(16) 3849(2) 6321(2) 1571(1) 15(1)

C(17) 3655(2) 6539(2) 1297(1) 18(1)

C(18) 3397(2) 7219(2) 1255(1) 21(1)

C(19) 3307(2) 7662(2) 1494(1) 16(1)

C(20) 3506(2) 7436(2) 1767(1) 14(1)

C(21) 3015(2) 8398(2) 1441(1) 25(1)

C(22) 3535(2) 8896(2) 1296(1) 18(1)

C(23) 3502(2) 9040(2) 1005(1) 21(1)

C(24) 4004(2) 9454(2) 872(1) 28(1)

C(25) 4547(2) 9724(2) 1039(1) 22(1)

C(26) 4601(2) 9596(2) 1335(1) 16(1)

C(27) 4086(2) 9176(2) 1470(1) 17(1)

C(28) 5236(2) 9877(2) 1507(1) 20(1)

C(29) 3256(1) 4612(1) 1826(1) 17(1)

C(30) 3252(1) 4544(1) 2128(1) 28(1)

C(31) 3829(1) 4253(1) 2270(1) 36(1)

C(32) 4409(1) 4031(1) 2111(1) 31(1)

C(33) 4413(1) 4100(1) 1809(1) 24(1)

C(34) 3837(1) 4390(1) 1667(1) 10(1)

C(35) 5004(2) 3763(2) 1632(1) 33(1)

C(36) 4852(1) 2982(1) 1557(1) 34(1)

C(37) 4927(1) 2482(1) 1776(1) 38(1)

C(38) 4745(1) 1786(1) 1723(1) 43(1)

C(39) 4488(1) 1590(1) 1451(1) 30(1)

C(40) 4412(2) 2090(1) 1232(1) 31(1)

C(41) 4594(1) 2786(1) 1285(1) 24(1)

C(42) 4128(2) 1862(2) 944(1) 45(1)

C(43) 3303(2) 1828(2) 935(1) 30(1)

C(44) 2952(2) 1210(2) 958(1) 42(1)

C(45) 2233(2) 1177(2) 974(1) 37(1)

C(46) 1846(2) 1790(2) 955(1) 45(1)

C(47) 2191(3) 2445(2) 927(1) 62(2)

C(48) 2941(2) 2461(2) 908(1) 35(1)

C(49) 1767(3) 3123(3) 919(1) 75(1)

C(50) 1689(1) 3487(1) 1207(1) 69(2)

C(51) 1120(1) 3319(1) 1384(1) 69(1)

C(52) 1037(1) 3649(2) 1652(1) 59(1)

C(53) 1524(2) 4147(2) 1744(1) 67(2)

C(54) 2093(2) 4315(1) 1567(1) 34(1)

C(55) 2176(1) 3985(1) 1299(1) 32(1)

C(56) 2612(2) 4897(2) 1669(1) 28(1)

C(57) 3236(2) 7349(2) 51(1) 22(1)

C(58) 5089(2) 6919(2) -257(1) 20(1)

C(59) 2206(2) 7527(2) -303(1) 41(1)

C(60) 2428(2) 7957(2) -572(1) 36(1)

C(61) 2829(2) 7534(2) -810(1) 39(1)

C(62) 3586(2) 7326(2) -731(1) 33(1)

C(63) 4086(2) 7937(2) -694(1) 22(1)

C(64) 4853(2) 7755(2) -694(1) 24(1)

C(65) 4378(2) 8196(2) 175(1) 20(1)

C(66) 5853(2) 6857(2) 261(1) 14(1)

C(67) 4995(2) 9304(2) -32(1) 26(1)

C(68) 5460(2) 9614(2) 192(1) 30(1)

C(69) 5943(2) 9084(2) 350(1) 38(1)

C(70) 6398(2) 8702(2) 135(1) 25(1)

C(71) 6985(2) 8265(2) 269(1) 36(1)

C(72) 6741(2) 7729(2) 498(1) 38(1)

C(73) 4569(2) 7471(2) 709(1) 18(1)

C(74) 5064(2) 5661(2) 429(1) 17(1)

C(75) 5256(2) 7606(2) 1193(1) 24(1)

C(76) 5822(2) 7040(2) 1197(1) 17(1)

C(77) 5527(2) 6304(2) 1172(1) 22(1)

C(78) 6072(2) 5769(2) 1055(1) 20(1)

C(79) 5788(2) 5010(2) 1043(1) 33(1)

C(80) 5061(2) 4946(2) 905(1) 23(1)

C(81) 3560(2) 6466(2) 521(1) 14(1)

C(82) 4323(2) 5784(2) -120(1) 18(1)

C(83) 3043(2) 5289(2) 700(1) 26(1)

C(84) 2383(2) 5062(2) 534(1) 27(1)

C(85) 2459(2) 5072(2) 205(1) 38(1)

C(86) 3003(2) 4564(2) 80(1) 41(1)

C(87) 3086(3) 4534(2) -239(1) 54(1)

C(88) 3234(2) 5259(2) -378(1) 38(1)

C(2S) 3430(1) 10241(1) 126(2) 35(2)

O(1S) 2765(1) 9919(2) 154(2) 88(2)

C(1S) 3660(3) 11001(1) 141(2) 76(3) _________________________________________________________________

**Table S17.** Anisotropic displacement parameters (Å2x103) for [Rh2(dihex)4][Calix]2·0.5C2H5OH (**6**) at 16K.

_______________________________________________________________________

Atom U11 U22 U33 U23 U13 U12

_______________________________________________________________________

Rh(2) 16(1) 17(1) 7(1) 1(1) -1(1) 1(1)

Rh(1) 16(1) 23(1) 8(1) 5(1) -1(1) -1(1)

O(1) 22(1) 21(1) 21(1) 1(1) 3(1) -3(1)

O(2) 22(1) 24(1) 29(1) -7(1) 7(1) -1(1)

O(3) 26(1) 27(1) 15(1) -4(1) 4(1) 0(1)

O(4) 15(1) 21(1) 26(1) -2(1) 1(1) 6(1)

O(5) 26(1) 25(1) 19(1) -1(1) 4(1) -4(1)

O(6) 55(2) 27(1) 34(1) -4(1) 30(1) -12(1)

O(7) 97(2) 24(1) 5(1) 2(1) -2(1) -16(2)

O(8) 45(1) 32(1) 32(1) 8(1) -13(1) -3(1)

N(1) 13(2) 51(2) 34(2) 27(2) -9(1) -10(2)

N(2) 19(2) 28(2) 17(1) 2(1) -2(1) -4(1)

N(3) 19(1) 28(2) 28(2) 11(2) -4(1) 5(1)

N(4) 22(1) 10(1) 31(2) 3(1) 2(1) 6(1)

N(5) 14(1) 14(1) 12(1) -1(1) 0(1) 0(1)

N(6) 17(1) 17(1) 15(1) -1(1) 2(1) 0(1)

N(7) 21(1) 21(1) 19(1) -1(1) 1(1) 0(1)

N(8) 15(2) 44(2) 15(1) -8(1) -1(1) -7(1)

C(1) 19(2) 14(2) 25(2) -6(2) -3(2) -1(2)

C(2) 14(1) 16(1) 14(1) 1(1) 1(1) -1(1)

C(3) 13(2) 20(2) 30(2) -4(2) 1(2) -11(2)

C(4) 17(1) 18(1) 18(1) 1(1) -1(1) -1(1)

C(5) 20(1) 19(1) 19(1) -1(1) -1(1) 0(1)

C(6) 10(2) 24(2) 14(2) -4(2) -1(1) -3(1)

C(7) 14(2) 43(2) 9(2) 4(2) -5(1) 7(2)

C(8) 23(1) 23(1) 22(1) 1(1) -1(1) 1(1)

C(9) 19(1) 19(1) 16(1) 1(1) -1(1) 1(1)

C(10) 31(1) 30(1) 29(1) 1(1) 0(1) 1(1)

C(11) 27(1) 27(1) 26(1) 1(1) -2(1) -1(1)

C(12) 19(1) 18(1) 14(1) 2(1) 0(1) 1(1)

C(13) 21(1) 23(1) 20(1) 1(1) 1(1) 0(1)

C(14) 22(1) 22(1) 20(1) 0(1) 0(1) -1(1)

C(15) 19(2) 34(2) 16(2) 3(2) 4(2) -10(2)

C(16) 15(1) 14(1) 15(1) 1(1) 0(1) -1(1)

C(17) 17(1) 18(1) 18(1) -2(1) -1(1) -1(1)

C(18) 20(1) 22(1) 20(1) 1(1) -1(1) -1(1)

C(19) 16(1) 17(1) 16(1) 0(1) 0(1) -1(1)

C(20) 14(1) 15(1) 13(1) 0(1) 2(1) -1(1)

C(21) 12(2) 31(2) 31(2) -9(2) -8(2) 8(2)

C(22) 19(2) 15(2) 20(2) 11(2) 3(2) 6(2)

C(23) 21(2) 25(2) 17(2) -2(2) -7(2) -1(2)

C(24) 35(2) 30(2) 18(2) -2(2) 0(2) 14(2)

C(25) 22(1) 21(1) 21(1) 1(1) 1(1) 1(1)

C(26) 16(1) 16(1) 17(1) 0(1) 0(1) 3(1)

C(27) 17(1) 17(1) 17(1) 1(1) 0(1) 1(1)

C(28) 20(1) 19(1) 20(1) 1(1) 2(1) 0(1)

C(29) 18(1) 17(1) 17(1) 0(1) 1(1) 0(1)

C(30) 30(1) 28(1) 28(1) 2(1) 2(1) 0(1)

C(31) 62(3) 35(2) 11(2) -6(2) 8(2) -12(2)

C(32) 38(2) 18(2) 37(2) 13(2) -5(2) -11(2)

C(33) 23(2) 13(2) 36(2) -12(2) 8(2) -13(2)

C(34) 12(1) 10(1) 9(1) -1(1) 2(1) 0(1)

C(35) 28(2) 15(2) 56(2) -4(2) 1(2) -3(2)

C(36) 5(2) 9(2) 86(3) -1(2) 3(2) -5(2)

C(37) 26(2) 21(2) 67(3) 2(2) -8(2) 2(2)

C(38) 20(2) 22(2) 88(3) 16(2) 10(2) 12(2)

C(39) 30(1) 29(1) 32(1) -1(1) 2(1) -1(1)

C(40) 31(1) 31(1) 30(1) -1(1) 3(1) 0(1)

C(41) 20(2) 15(2) 37(2) -17(2) 14(2) -3(2)

C(42) 45(1) 44(1) 45(1) 0(1) 4(1) -2(1)

C(43) 32(1) 30(1) 28(1) -1(1) 0(1) 0(1)

C(44) 64(3) 23(2) 38(2) -1(2) -5(2) -15(2)

C(45) 44(2) 26(2) 40(2) 0(2) -11(2) -14(2)

C(46) 45(1) 45(1) 45(1) -1(1) -3(1) -1(1)

C(47) 95(3) 20(2) 71(3) 14(2) -66(2) -8(2)

C(48) 37(1) 35(1) 34(1) -1(1) -2(1) -1(1)

C(49) 75(1) 75(1) 76(1) 0(1) -3(1) 0(1)

C(50) 52(3) 27(2) 129(4) 9(3) -59(3) 6(2)

C(51) 68(1) 68(1) 71(1) 1(1) -2(1) 0(1)

C(52) 58(1) 59(1) 62(1) 3(1) 0(1) 0(1)

C(53) 10(2) 26(2) 163(5) 8(3) 7(3) -3(2)

C(54) 33(1) 33(1) 36(1) 2(1) -1(1) 1(1)

C(55) 31(1) 31(1) 33(1) 0(1) -4(1) 1(1)

C(56) 21(2) 18(2) 47(2) -9(2) 1(2) -3(2)

C(57) 21(1) 22(1) 21(1) 0(1) 2(1) 0(1)

C(58) 15(2) 15(2) 29(2) 7(2) 6(2) -1(2)

C(59) 40(1) 42(1) 41(1) 2(1) -1(1) 1(1)

C(60) 17(2) 64(3) 26(2) 19(2) -13(2) -16(2)

C(61) 39(1) 40(1) 38(1) 2(1) -1(1) 0(1)

C(62) 28(2) 56(2) 16(2) 15(2) -3(2) -11(2)

C(63) 26(2) 24(2) 18(2) 6(2) -1(2) -5(2)

C(64) 24(1) 24(1) 23(1) 2(1) -1(1) 0(1)

C(65) 19(1) 21(1) 18(1) 1(1) -2(1) -1(1)

C(66) 14(1) 14(1) 14(1) 0(1) -1(1) 0(1)

C(67) 27(1) 27(1) 26(1) 1(1) -1(1) -1(1)

C(68) 32(2) 39(2) 17(2) 4(2) 13(2) -5(2)

C(69) 38(2) 18(2) 59(2) -13(2) 1(2) -11(2)

C(70) 29(2) 33(2) 14(2) 11(2) 13(2) -6(2)

C(71) 33(2) 26(2) 48(2) -4(2) 8(2) -13(2)

C(72) 21(2) 30(2) 62(3) 11(2) -8(2) 3(2)

C(73) 18(1) 18(1) 19(1) 0(1) 0(1) 0(1)

C(74) 25(2) 14(2) 12(2) 5(1) 0(2) -1(2)

C(75) 25(1) 25(1) 23(1) -1(1) 0(1) -1(1)

C(76) 17(1) 19(1) 15(1) -2(1) 0(1) 0(1)

C(77) 22(1) 23(1) 21(1) 1(1) 0(1) 0(1)

C(78) 18(2) 35(2) 7(2) 2(2) -2(2) 5(2)

C(79) 27(2) 28(2) 43(2) 20(2) -6(2) 2(2)

C(80) 24(1) 23(1) 23(1) 0(1) 0(1) 1(1)

C(81) 15(1) 14(1) 13(1) -1(1) -3(1) 0(1)

C(82) 18(1) 19(1) 18(1) 0(1) 1(1) 0(1)

C(83) 51(2) 17(2) 10(2) -7(2) 1(2) -10(2)

C(84) 30(2) 19(2) 31(2) -6(2) -2(2) -14(2)

C(85) 19(2) 53(2) 41(2) -22(2) -18(2) 10(2)

C(86) 38(2) 57(3) 30(2) -19(2) 1(2) -1(2)

C(87) 54(1) 54(1) 54(1) -2(1) 0(1) -1(1)

C(88) 38(1) 40(1) 36(1) -1(1) -1(1) -2(1) ______________________________________________________________________

**Table S18.** Selected Bond Lengths (Å) and Angles () for [Rh2(dihex)4][Calix]2·0.5C2H5OH (**6**) at 16K.

________________________________________________________________________

Rh(2)-C(58) 1.956(3)

Rh(2)-C(66) 1.978(3)

Rh(2)-C(82) 1.988(3)

Rh(2)-C(74) 2.002(3)

Rh(1)-C(65) 1.971(4)

Rh(1)-C(57) 1.974(3)

Rh(1)-C(81) 1.999(3)

Rh(1)-C(73) 2.003(3)

O(1)-C(6) 1.335(4)

O(2)-C(13) 1.380(4)

O(3)-C(20) 1.388(4)

O(4)-C(27) 1.352(4)

O(5)-C(34) 1.352(3)

O(6)-C(41) 1.377(3)

O(7)-C(48) 1.358(5)

O(8)-C(55) 1.313(3)

N(1)-C(57) 1.128(4)

N(1)-C(59) 1.447(5)

N(2)-C(58) 1.158(4)

N(2)-C(64) 1.444(4)

N(3)-C(65) 1.148(4)

N(3)-C(67) 1.449(5)

N(4)-C(66) 1.141(4)

N(4)-C(72) 1.469(5)

N(5)-C(73) 1.130(4)

N(5)-C(75) 1.467(4)

N(6)-C(74) 1.132(4)

N(6)-C(80) 1.442(4)

N(7)-C(81) 1.121(4)

N(7)-C(83) 1.460(4)

N(8)-C(82) 1.133(4)

N(8)-C(88) 1.459(5)

C(1)-C(2) 1.368(5)

C(1)-C(6) 1.418(5)

C(1)-C(28) 1.515(5)

C(2)-C(3) 1.379(5)

C(3)-C(4) 1.396(5)

C(4)-C(5) 1.386(5)

C(5)-C(6) 1.395(5)

C(5)-C(7) 1.554(5)

C(7)-C(8) 1.525(5)

C(8)-C(9) 1.375(5)

C(8)-C(13) 1.408(5)

C(9)-C(10) 1.409(5)

C(10)-C(11) 1.380(5)

C(11)-C(12) 1.404(5)

C(12)-C(13) 1.401(5)

C(12)-C(14) 1.540(5)

C(14)-C(15) 1.512(5)

C(15)-C(16) 1.387(5)

C(15)-C(20) 1.407(5)

C(16)-C(17) 1.373(5)

C(17)-C(18) 1.397(5)

C(18)-C(19) 1.394(5)

C(19)-C(20) 1.375(4)

C(19)-C(21) 1.526(5)

C(21)-C(22) 1.522(5)

C(22)-C(23) 1.367(5)

C(22)-C(27) 1.419(5)

C(23)-C(24) 1.379(5)

C(24)-C(25) 1.383(5)

C(25)-C(26) 1.384(5)

C(26)-C(27) 1.406(5)

C(26)-C(28) 1.537(5)

C(29)-C(30) 1.3900

C(29)-C(34) 1.3900

C(29)-C(56) 1.522(4)

C(30)-C(31) 1.3900

C(31)-C(32) 1.3900

C(32)-C(33) 1.3900

C(33)-C(34) 1.3900

C(33)-C(35) 1.527(4)

C(35)-C(36) 1.551(4)

C(36)-C(37) 1.3900

C(36)-C(41) 1.3900

C(37)-C(38) 1.3900

C(38)-C(39) 1.3900

C(39)-C(40) 1.3900

C(40)-C(41) 1.3900

C(40)-C(42) 1.492(5)

C(42)-C(43) 1.572(6)

C(43)-C(44) 1.357(6)

C(43)-C(48) 1.394(6)

C(44)-C(45) 1.371(6)

C(45)-C(46) 1.382(6)

C(46)-C(47) 1.413(6)

C(47)-C(48) 1.429(6)

C(47)-C(49) 1.523(7)

C(49)-C(50) 1.501(6)

C(50)-C(51) 1.3900

C(50)-C(55) 1.3900

C(51)-C(52) 1.3900

C(52)-C(53) 1.3900

C(53)-C(54) 1.3900

C(54)-C(55) 1.3900

C(54)-C(56) 1.554(4)

C(59)-C(60) 1.538(6)

C(60)-C(61) 1.556(6)

C(61)-C(62) 1.536(5)

C(62)-C(63) 1.511(5)

C(63)-C(64) 1.499(5)

C(67)-C(68) 1.478(5)

C(68)-C(69) 1.546(6)

C(69)-C(70) 1.499(5)

C(70)-C(71) 1.521(5)

C(71)-C(72) 1.536(6)

C(75)-C(76) 1.523(5)

C(76)-C(77) 1.513(5)

C(77)-C(78) 1.548(5)

C(78)-C(79) 1.541(5)

C(79)-C(80) 1.528(5)

C(83)-C(84) 1.527(5)

C(84)-C(85) 1.515(5)

C(85)-C(86) 1.527(6)

C(86)-C(87) 1.472(6)

C(87)-C(88) 1.544(6)

C(2S)-O(1S) 1.412(3)

C(2S)-C(1S) 1.512(3)

________________________________________________________________________

________________________________________________________________________

C(58)-Rh(2)-C(66) 90.3(1)

C(58)-Rh(2)-C(82) 85.6(1)

C(66)-Rh(2)-C(82) 174.2(1)

C(58)-Rh(2)-C(74) 174.9(1)

C(66)-Rh(2)-C(74) 90.7(1)

C(82)-Rh(2)-C(74) 93.0(1)

C(65)-Rh(1)-C(57) 89.0(1)

C(65)-Rh(1)-C(81) 178.5(1)

C(57)-Rh(1)-C(81) 89.5(1)

C(65)-Rh(1)-C(73) 90.9(1)

C(57)-Rh(1)-C(73) 165.7(1)

C(81)-Rh(1)-C(73) 90.5(1)

C(57)-N(1)-C(59) 170.9(4)

C(58)-N(2)-C(64) 172.0(3)

C(65)-N(3)-C(67) 173.6(3)

C(66)-N(4)-C(72) 172.7(3)

C(73)-N(5)-C(75) 170.9(3)

C(74)-N(6)-C(80) 173.0(3)

C(81)-N(7)-C(83) 176.1(3)

C(82)-N(8)-C(88) 172.8(3)

C(2)-C(1)-C(6) 119.7(3)

C(2)-C(1)-C(28) 119.4(3)

C(6)-C(1)-C(28) 120.9(3)

C(1)-C(2)-C(3) 122.4(3)

C(2)-C(3)-C(4) 118.4(3)

C(5)-C(4)-C(3) 120.4(3)

C(4)-C(5)-C(6) 121.0(3)

C(4)-C(5)-C(7) 118.2(3)

C(6)-C(5)-C(7) 120.8(3)

O(1)-C(6)-C(5) 121.6(3)

O(1)-C(6)-C(1) 120.3(3)

C(5)-C(6)-C(1) 118.1(3)

C(8)-C(7)-C(5) 113.8(3)

C(9)-C(8)-C(13) 118.9(3)

C(9)-C(8)-C(7) 121.8(3)

C(13)-C(8)-C(7) 119.3(3)

C(8)-C(9)-C(10) 120.0(3)

C(11)-C(10)-C(9) 121.7(3)

C(10)-C(11)-C(12) 118.5(3)

C(13)-C(12)-C(11) 119.8(3)

C(13)-C(12)-C(14) 119.3(3)

C(11)-C(12)-C(14) 120.9(3)

O(2)-C(13)-C(12) 117.2(3)

O(2)-C(13)-C(8) 121.9(3)

C(12)-C(13)-C(8) 120.9(3)

C(15)-C(14)-C(12) 107.3(3)

C(16)-C(15)-C(20) 118.0(3)

C(16)-C(15)-C(14) 118.8(3)

C(20)-C(15)-C(14) 123.0(3)

C(17)-C(16)-C(15) 121.4(3)

C(16)-C(17)-C(18) 119.9(3)

C(19)-C(18)-C(17) 119.8(3)

C(20)-C(19)-C(18) 119.4(3)

C(20)-C(19)-C(21) 122.2(3)

C(18)-C(19)-C(21) 118.3(3)

C(19)-C(20)-O(3) 118.9(3)

C(19)-C(20)-C(15) 121.4(3)

O(3)-C(20)-C(15) 119.6(3)

C(22)-C(21)-C(19) 113.8(3)

C(23)-C(22)-C(27) 120.5(3)

C(23)-C(22)-C(21) 121.3(3)

C(27)-C(22)-C(21) 118.0(3)

C(22)-C(23)-C(24) 120.8(3)

C(23)-C(24)-C(25) 119.2(3)

C(24)-C(25)-C(26) 122.0(3)

C(25)-C(26)-C(27) 118.7(3)

C(25)-C(26)-C(28) 119.9(3)

C(27)-C(26)-C(28) 121.3(3)

O(4)-C(27)-C(26) 122.1(3)

O(4)-C(27)-C(22) 119.2(3)

C(26)-C(27)-C(22) 118.7(3)

C(1)-C(28)-C(26) 111.7(3)

C(30)-C(29)-C(34) 120.0

C(30)-C(29)-C(56) 120.0(2)

C(34)-C(29)-C(56) 120.0(2)

C(31)-C(30)-C(29) 120.0

C(30)-C(31)-C(32) 120.0

C(33)-C(32)-C(31) 120.0

C(32)-C(33)-C(34) 120.0

C(32)-C(33)-C(35) 119.7(2)

C(34)-C(33)-C(35) 119.8(2)

O(5)-C(34)-C(33) 117.9(1)

O(5)-C(34)-C(29) 121.9(1)

C(33)-C(34)-C(29) 120.0

C(33)-C(35)-C(36) 112.5(2)

C(37)-C(36)-C(41) 120.0

C(37)-C(36)-C(35) 118.4(2)

C(41)-C(36)-C(35) 121.4(2)

C(36)-C(37)-C(38) 120.0

C(37)-C(38)-C(39) 120.0

C(38)-C(39)-C(40) 120.0

C(41)-C(40)-C(39) 120.0

C(41)-C(40)-C(42) 121.4(2)

C(39)-C(40)-C(42) 118.6(2)

O(6)-C(41)-C(40) 120.5(2)

O(6)-C(41)-C(36) 119.3(2)

C(40)-C(41)-C(36) 120.0

C(40)-C(42)-C(43) 113.3(3)

C(44)-C(43)-C(48) 120.8(4)

C(44)-C(43)-C(42) 121.7(4)

C(48)-C(43)-C(42) 117.4(3)

C(43)-C(44)-C(45) 122.3(4)

C(44)-C(45)-C(46) 119.4(4)

C(45)-C(46)-C(47) 120.1(4)

C(46)-C(47)-C(48) 119.3(4)

C(46)-C(47)-C(49) 120.2(4)

C(48)-C(47)-C(49) 120.5(4)

O(7)-C(48)-C(43) 122.7(4)

O(7)-C(48)-C(47) 119.2(4)

C(43)-C(48)-C(47) 118.0(4)

C(50)-C(49)-C(47) 114.8(4)

C(51)-C(50)-C(55) 120.0

C(51)-C(50)-C(49) 119.0(2)

C(55)-C(50)-C(49) 121.0(2)

C(50)-C(51)-C(52) 120.0

C(51)-C(52)-C(53) 120.0

C(52)-C(53)-C(54) 120.0

C(55)-C(54)-C(53) 120.0

C(55)-C(54)-C(56) 121.1(2)

C(53)-C(54)-C(56) 118.9(2)

O(8)-C(55)-C(54) 121.28(17)

O(8)-C(55)-C(50) 118.65(17)

C(54)-C(55)-C(50) 120.0

C(29)-C(56)-C(54) 113.6(3)

N(1)-C(57)-Rh(1) 177.0(3)

N(2)-C(58)-Rh(2) 175.6(3)

N(1)-C(59)-C(60) 111.5(3)

C(59)-C(60)-C(61) 114.8(3)

C(62)-C(61)-C(60) 115.4(3)

C(63)-C(62)-C(61) 114.7(3)

C(64)-C(63)-C(62) 115.8(3)

N(2)-C(64)-C(63) 111.6(3)

N(3)-C(65)-Rh(1) 178.7(3)

N(4)-C(66)-Rh(2) 178.0(3)

N(3)-C(67)-C(68) 112.4(3)

C(67)-C(68)-C(69) 115.0(3)

C(70)-C(69)-C(68) 110.4(3)

C(69)-C(70)-C(71) 115.1(3)

C(70)-C(71)-C(72) 114.6(3)

N(4)-C(72)-C(71) 110.2(3)

N(5)-C(73)-Rh(1) 176.9(3)

N(6)-C(74)-Rh(2) 179.0(3)

N(5)-C(75)-C(76) 108.8(3)

C(77)-C(76)-C(75) 113.1(3)

C(76)-C(77)-C(78) 112.8(3)

C(79)-C(78)-C(77) 113.2(3)

C(80)-C(79)-C(78) 113.9(3)

N(6)-C(80)-C(79) 110.0(3)

N(7)-C(81)-Rh(1) 173.5(3)

N(8)-C(82)-Rh(2) 172.2(3)

N(7)-C(83)-C(84) 111.9(3)

C(85)-C(84)-C(83) 114.3(3)

C(84)-C(85)-C(86) 115.5(3)

C(87)-C(86)-C(85) 118.0(4)

C(86)-C(87)-C(88) 113.4(4)

N(8)-C(88)-C(87) 110.1(3)

O(1S)-C(2S)-C(1S) 132.0(3)

________________________________________________________________________

**Table S19.** Atomic Fractional Coordinates and Isotropic Thermal Parameters for [Rh2(dimen)4][PF6]2·CH3CN (**7**) at 90K.

_________________________________________________________________

Atom x y z Ueq(Å2)

_________________________________________________________________

Rh(1) 7068(1) 5091(1) 5630(1) 15(1)

P(1) 8882(1) 9105(1) 8196(1) 22(1)

F(1) 9416(3) 7724(2) 8896(2) 56(1)

F(2) 10520(2) 9169(2) 7802(2) 38(1)

F(3) 7245(2) 9042(2) 8583(1) 39(1)

F(4) 8560(2) 8969(1) 7137(1) 33(1)

F(5) 8356(2) 10481(1) 7489(1) 30(1)

F(6) 9203(2) 9248(1) 9246(1) 34(1)

N(1) 7899(2) 6927(2) 3360(2) 28(1)

N(2) 8735(2) 3333(2) 4787(2) 22(1)

N(3) 6283(2) 3258(2) 7934(2) 23(1)

N(4) 5480(2) 6966(2) 6343(2) 22(1)

C(1) 7586(2) 6271(2) 4209(2) 22(1)

C(2) 8200(3) 7675(2) 2203(2) 31(1)

C(3) 9643(3) 7020(4) 1938(3) 51(1)

C(4) 8377(6) 8796(4) 2097(3) 55(1)

C(5) 6918(3) 7848(2) 1458(2) 22(1)

C(6) 5448(3) 8416(2) 1752(2) 23(1)

C(7) 8109(2) 3934(2) 5144(2) 20(1)

C(8) 9522(2) 2657(2) 4237(2) 22(1)

C(9) 8408(3) 2299(2) 3790(2) 18(1)

C(10) 10364(3) 3459(3) 3289(2) 27(1)

C(11) 10618(3) 1619(3) 5081(2) 28(1)

C(20) 5572(3) 8211(3) 7159(3) 33(1)

C(21) 3605(3) 8770(2) 5729(2) 25(1)

C(23) 3601(3) 7098(3) 7620(2) 24(1)

C(12) 6568(2) 3909(2) 7070(2) 19(1)

C(13) 5887(3) 2478(2) 9040(2) 25(1)

C(14) 7139(4) 2182(4) 9864(3) 39(1)

C(15) 5798(3) 1354(2) 9031(2) 25(1)

C(16) 4438(3) 3054(3) 9302(2) 24(1)

C(17) 3172(2) 3284(2) 8516(2) 25(1)

C(18) 6064(2) 6284(2) 6068(2) 19(1)

C(19) 4572(2) 7762(2) 6726(2) 24(1)

C(22) 2559(2) 8379(2) 5298(2) 22(1)

C(24) 2565(2) 6673(2) 7179(2) 23(1)

C(25) 6861(8) 8731(9) 1820(9) 18(2)

C(26) 8395(12) 6982(8) 1584(8) 20(2)

C(27) 5684(11) 7702(9) 1109(9) 19(2)

C(28) 9544(10) 8084(11) 2258(11) 30(2)

C(29) 7095(13) 1398(9) 9551(12) 41(3)

C(30) 5539(18) 3243(12) 9614(12) 43(3)

C(36) 953(17) 8603(13) 5162(13) 19(3)

C(35) 3012(15) 7808(8) 6520(5) 18(3)

C(32) 8983(15) 3284(12) 3043(6) 17(3)

C(31) 11146(7) 2407(16) 4447(15) 28(3)

C(33) 5080(30) 7150(20) 7937(7) 46(5)

C(34) 5110(20) 8844(19) 6142(18) 39(4)

N(1S) 12704(7) 4883(8) 10571(7) 82(2)

C(1S) 11530(6) 4924(8) 10346(7) 62(2)

C(2S) 10000 5000 10000 76(2) _________________________________________________________________

**Table S20.** Anisotropic displacement parameters (Å2x103) for [Rh2(dimen)4][PF6]2·CH3CN (**7**) at 90K.

_______________________________________________________________________

Atom U11 U22 U33 U23 U13 U12

_______________________________________________________________________

Rh(1) 18(1) 16(1) 12(1) -7(1) 4(1) -5(1)

P(1) 30(1) 19(1) 18(1) -10(1) 5(1) -7(1)

F(1) 92(2) 19(1) 44(1) -8(1) -5(1) -5(1)

F(2) 27(1) 54(1) 47(1) -36(1) 9(1) -8(1)

F(3) 42(1) 56(1) 36(1) -29(1) 21(1) -31(1)

F(4) 40(1) 42(1) 30(1) -26(1) 8(1) -15(1)

F(5) 42(1) 21(1) 22(1) -8(1) 4(1) -5(1)

F(6) 46(1) 38(1) 20(1) -16(1) 1(1) -11(1)

N(1) 33(1) 31(1) 18(1) -5(1) 2(1) -15(1)

N(2) 23(1) 28(1) 23(1) -17(1) 3(1) -8(1)

N(3) 24(1) 27(1) 19(1) -10(1) 5(1) -11(1)

N(4) 20(1) 24(1) 26(1) -14(1) 3(1) -6(1)

C(1) 25(1) 24(1) 19(1) -9(1) 2(1) -10(1)

C(2) 32(1) 38(1) 17(1) -1(1) 2(1) -21(1)

C(3) 26(2) 81(3) 24(2) -3(2) 1(1) -20(2)

C(4) 85(3) 60(3) 24(2) -4(2) -5(2) -57(3)

C(5) 24(1) 24(1) 16(1) -6(1) 3(1) -10(1)

C(6) 31(1) 18(1) 21(1) -10(1) 6(1) -8(1)

C(7) 21(1) 22(1) 18(1) -10(1) 3(1) -8(1)

C(8) 21(1) 28(1) 22(1) -19(1) 4(1) -4(1)

C(9) 19(1) 20(1) 19(1) -13(1) 1(1) -2(1)

C(10) 25(1) 37(2) 27(1) -19(1) 6(1) -11(1)

C(11) 24(1) 35(2) 27(1) -19(1) -5(1) 1(1)

C(20) 29(1) 37(2) 45(2) -30(1) -1(1) -7(1)

C(21) 26(1) 20(1) 32(1) -14(1) 0(1) -6(1)

C(23) 24(1) 33(1) 19(1) -15(1) 1(1) -5(1)

C(12) 20(1) 21(1) 18(1) -11(1) 4(1) -6(1)

C(13) 28(1) 32(1) 14(1) -7(1) 6(1) -15(1)

C(14) 31(2) 59(2) 19(1) -6(1) -3(1) -19(2)

C(15) 28(1) 19(1) 21(1) -5(1) 5(1) -3(1)

C(16) 30(1) 24(1) 23(1) -15(1) 9(1) -11(1)

C(17) 27(1) 20(1) 25(1) -11(1) 9(1) -4(1)

C(18) 20(1) 20(1) 19(1) -9(1) 3(1) -7(1)

C(19) 21(1) 28(1) 31(1) -20(1) 1(1) -5(1)

C(22) 24(1) 19(1) 21(1) -8(1) 2(1) -6(1)

C(24) 24(1) 25(1) 17(1) -7(1) 1(1) -8(1) ______________________________________________________________________

**Table S21.** Selected Bond Lengths (Å) and Angles () for [Rh2(dimen)4][PF6]2·CH3CN (**7**) at 90K.

________________________________________________________________________

Rh(1)-C(1) 1.962(2)

Rh(1)-C(18) 1.964(2)

Rh(1)-C(12) 1.973(2)

Rh(1)-C(7) 1.976(2)

P(1)-F(5) 1.592(2)

P(1)-F(1) 1.598(2)

P(1)-F(6) 1.598(2)

P(1)-F(3) 1.599(2)

P(1)-F(2) 1.602(2)

P(1)-F(4) 1.606(2)

N(1)-C(1) 1.149(3)

N(1)-C(2) 1.470(3)

N(2)-C(7) 1.146(3)

N(2)-C(8) 1.464(3)

N(3)-C(12) 1.151(3)

N(3)-C(13) 1.460(3)

N(4)-C(18) 1.148(3)

N(4)-C(19) 1.460(3)

C(2)-C(4) 1.496(5)

C(2)-C(26) 1.498(5)

C(2)-C(28) 1.527(5)

C(2)-C(3) 1.537(4)

C(2)-C(25) 1.55(1)

C(2)-C(5) 1.554(3)

C(5)-C(6) 1.524(4)

C(5)-C(17)#1 1.528(4)

C(6)-C(25) 1.523(5)

C(6)-C(15)#1 1.535(4)

C(6)-C(27) 1.55(1)

C(8)-C(32) 1.506(5)

C(8)-C(31) 1.508(5)

C(8)-C(11) 1.521(4)

C(8)-C(9) 1.538(3)

C(8)-C(10) 1.553(4)

C(9)-C(24)#1 1.535(3)

C(9)-C(22)#1 1.540(3)

C(20)-C(19) 1.528(3)

C(21)-C(22) 1.503(3)

C(21)-C(19) 1.544(4)

C(23)-C(19) 1.524(4)

C(23)-C(24) 1.538(3)

C(13)-C(16) 1.494(4)

C(13)-C(29) 1.497(5)

C(13)-C(30) 1.523(5)

C(13)-C(15) 1.541(4)

C(13)-C(14) 1.550(4)

C(13)-C(27)#1 1.61(1)

C(15)-C(6)#1 1.535(4)

C(16)-C(17) 1.553(3)

C(17)-C(5)#1 1.528(4)

C(19)-C(34) 1.49(2)

C(19)-C(35) 1.51(1)

C(19)-C(33) 1.519(5)

C(22)-C(36) 1.48(2)

C(22)-C(35) 1.522(5)

C(22)-C(9)#1 1.540(3)

C(24)-C(32)#1 1.50(1)

C(24)-C(35) 1.512(5)

C(24)-C(9)#1 1.535(3)

C(27)-C(17)#1 1.38(1)

C(27)-C(13)#1 1.61(1)

C(32)-C(24)#1 1.50(1)

N(1S)-C(1S) 1.158(5)

C(1S)-C(2S) 1.525(4)

C(2S)-C(1S)#2 1.525(4)

____________________________________________________________________

_______________________________________________________________________

C(1)-Rh(1)-C(18) 91.42(9)

C(1)-Rh(1)-C(12) 179.13(9)

C(18)-Rh(1)-C(12) 88.27(9)

C(1)-Rh(1)-C(7) 86.54(9)

C(18)-Rh(1)-C(7) 177.92(9)

C(12)-Rh(1)-C(7) 93.77(9)

F(5)-P(1)-F(1) 179.5(1)

F(5)-P(1)-F(6) 89.87(8)

F(1)-P(1)-F(6) 90.6(1)

F(5)-P(1)-F(3) 90.18(9)

F(1)-P(1)-F(3) 90.1(1)

F(6)-P(1)-F(3) 90.05(9)

F(5)-P(1)-F(2) 89.74(9)

F(1)-P(1)-F(2) 89.9(1)

F(6)-P(1)-F(2) 90.25(9)

F(3)-P(1)-F(2) 179.69(9)

F(5)-P(1)-F(4) 89.85(8)

F(1)-P(1)-F(4) 89.7(1)

F(6)-P(1)-F(4) 179.71(9)

F(3)-P(1)-F(4) 90.06(9)

F(2)-P(1)-F(4) 89.64(8)

C(1)-N(1)-C(2) 171.1(2)

C(7)-N(2)-C(8) 175.0(2)

C(12)-N(3)-C(13) 177.4(2)

C(18)-N(4)-C(19) 172.3(2)

N(1)-C(1)-Rh(1) 177.0(2)

N(1)-C(2)-C(4) 109.2(2)

N(1)-C(2)-C(26) 108.0(5)

N(1)-C(2)-C(28) 105.7(5)

C(26)-C(2)-C(28) 115.0(7)

N(1)-C(2)-C(3) 106.5(2)

C(4)-C(2)-C(3) 109.8(3)

N(1)-C(2)-C(25) 103.6(4)

C(26)-C(2)-C(25) 115.4(6)

C(28)-C(2)-C(25) 108.2(6)

N(1)-C(2)-C(5) 107.8(2)

C(4)-C(2)-C(5) 112.7(3)

C(3)-C(2)-C(5) 110.5(2)

C(6)-C(5)-C(17)#1 109.8(2)

C(6)-C(5)-C(2) 112.2(2)

C(17)#1-C(5)-C(2) 112.7(2)

C(5)-C(6)-C(15)#1 111.7(2)

C(25)-C(6)-C(27) 110.1(6)

N(2)-C(7)-Rh(1) 174.7(2)

N(2)-C(8)-C(32) 108.1(6)

N(2)-C(8)-C(31) 109.2(7)

C(32)-C(8)-C(31) 116.8(9)

N(2)-C(8)-C(11) 107.7(2)

N(2)-C(8)-C(9) 108.9(2)

C(11)-C(8)-C(9) 112.6(2)

N(2)-C(8)-C(10) 106.3(2)

C(11)-C(8)-C(10) 109.2(2)

C(9)-C(8)-C(10) 111.8(2)

N(2)-C(8)-C(36)#1 106.9(6)

C(32)-C(8)-C(36)#1 107.7(8)

C(31)-C(8)-C(36)#1 107.8(9)

C(24)#1-C(9)-C(8) 113.2(2)

C(24)#1-C(9)-C(22)#1 109.6(2)

C(8)-C(9)-C(22)#1 112.5(2)

C(22)-C(21)-C(19) 112.9(2)

C(19)-C(23)-C(24) 112.4(2)

N(3)-C(12)-Rh(1) 176.2(2)

N(3)-C(13)-C(16) 109.0(2)

N(3)-C(13)-C(29) 109.7(6)

N(3)-C(13)-C(30) 102.8(6)

C(29)-C(13)-C(30) 117.1(9)

N(3)-C(13)-C(15) 107.7(2)

C(16)-C(13)-C(15) 110.6(2)

N(3)-C(13)-C(14) 107.6(2)

C(16)-C(13)-C(14) 113.1(2)

C(15)-C(13)-C(14) 108.7(2)

N(3)-C(13)-C(27)#1 106.2(4)

C(29)-C(13)-C(27)#1 116.1(7)

C(30)-C(13)-C(27)#1 103.6(7)

C(6)#1-C(15)-C(13) 111.3(2)

C(13)-C(16)-C(17) 112.9(2)

C(5)#1-C(17)-C(16) 110.5(2)

C(27)#1-C(17)-C(26)#1 112.7(6)

N(4)-C(18)-Rh(1) 178.8(2)

N(4)-C(19)-C(34) 105.0(9)

N(4)-C(19)-C(35) 105.7(5)

C(34)-C(19)-C(35) 119.1(9)

N(4)-C(19)-C(33) 101(1)

C(34)-C(19)-C(33) 109(1)

C(35)-C(19)-C(33) 116(1)

N(4)-C(19)-C(23) 107.7(2)

N(4)-C(19)-C(20) 108.8(2)

C(23)-C(19)-C(20) 112.3(2)

N(4)-C(19)-C(21) 107.7(2)

C(23)-C(19)-C(21) 109.4(2)

C(20)-C(19)-C(21) 110.8(2)

C(36)-C(22)-C(35) 110.6(8)

C(21)-C(22)-C(9)#1 112.4(2)

C(32)#1-C(24)-C(35) 114.9(7)

C(9)#1-C(24)-C(23) 110.5(2)

C(6)-C(25)-C(2) 112.6(6)

C(2)-C(26)-C(17)#1 109.5(6)

C(17)#1-C(27)-C(6) 116.7(7)

C(17)#1-C(27)-C(13)#1 115.9(7)

C(6)-C(27)-C(13)#1 107.2(6)

C(22)-C(36)-C(8)#1 109.0(9)

C(19)-C(35)-C(24) 114.9(7)

C(19)-C(35)-C(22) 114.1(7)

C(24)-C(35)-C(22) 111.8(4)

C(24)#1-C(32)-C(8) 117.1(8)

N(1S)-C(1S)-C(2S) 177.7(9)

C(1S)-C(2S)-C(1S)#2 179.999(1)

________________________________________________________________________

Symmetry transformations used to generate equivalent atoms:

#1 -x+1,-y+1,-z+1 #2 -x+2,-y+1,-z+2

**Table S22.** Atomic Fractional Coordinates and Isotropic Thermal Parameters for [Rh2(dimen)4][Calix]2·0.64H2O (**8**) at 90K.

_________________________________________________________________

Atom x y z Ueq(Å2)

_________________________________________________________________

Rh(1) -1805(1) 10272(1) -483(1) 37(1)

N(1) -566(5) 11062(2) -1193(4) 37(1)

N(2) -1324(5) 10889(2) 1270(4) 41(1)

N(3) -3279(5) 9578(2) 295(3) 39(1)

N(4) -2551(5) 9693(2) -2327(3) 39(1)

O(1) -158(5) 12387(2) -4664(3) 56(1)

O(2) -2431(5) 12531(2) -4532(3) 48(1)

O(3) -3477(5) 11690(2) -5415(3) 62(2)

O(4) -988(4) 11632(2) -5205(3) 46(1)

C(1) 1819(6) 12059(2) -3708(4) 32(1)

C(2) 2831(6) 12041(2) -2829(4) 35(2)

C(3) 2871(6) 12298(2) -2072(4) 35(2)

C(4) 1863(6) 12604(2) -2195(4) 34(2)

C(5) 850(6) 12644(2) -3055(4) 34(1)

C(6) 836(6) 12368(2) -3818(4) 35(2)

C(7) -228(6) 12974(2) -3156(5) 46(2)

C(8) -1394(7) 12806(2) -2922(5) 44(2)

C(9) -1449(7) 12854(2) -2015(5) 46(2)

C(10) -2521(8) 12708(2) -1793(6) 56(2)

C(11) -3523(7) 12492(2) -2494(6) 50(2)

C(12) -3490(7) 12422(2) -3393(5) 43(2)

C(13) -2433(6) 12588(2) -3635(5) 39(2)

C(14) -4524(6) 12136(2) -4119(5) 50(2)

C(15) -4114(6) 11657(2) -4027(5) 38(2)

C(16) -4231(6) 11397(2) -3290(5) 39(2)

C(17) -3740(7) 10975(2) -3123(5) 43(2)

C(18) -3117(7) 10800(2) -3712(5) 42(2)

C(19) -2986(6) 11038(2) -4470(5) 38(2)

C(20) -3537(6) 11464(2) -4641(4) 40(2)

C(21) -2314(7) 10839(3) -5116(5) 52(2)

C(22) -845(7) 10876(2) -4762(4) 42(2)

C(23) -57(8) 10515(2) -4400(5) 48(2)

C(24) 1284(8) 10536(2) -4100(5) 51(2)

C(25) 1863(7) 10939(2) -4144(5) 46(2)

C(26) 1120(7) 11315(2) -4497(4) 39(2)

C(27) -237(7) 11280(2) -4817(4) 41(2)

C(28) 1793(7) 11748(2) -4520(5) 47(2)

C(29) -999(6) 10753(2) -977(4) 35(2)

C(30) 21(6) 11464(2) -1402(5) 38(2)

C(31) -159(12) 11840(3) -745(8) 43(3)

C(32) 1479(10) 11376(3) -1208(7) 33(2)

C(33) -694(10) 11617(3) -2434(7) 34(2)

C(43) -5267(12) 9290(4) 438(11) 60(4)

C(44) -3069(12) 9100(4) 1646(8) 45(3)

C(47) -3678(12) 8799(4) -3(9) 51(3)

C(53) 1064(15) 11586(5) -497(11) 39(4)

C(54) 526(19) 11330(7) -2187(11) 61(5)

C(55) -1080(20) 11779(7) -1647(16) 71(6)

C(56) -4430(20) 9300(7) 1344(14) 60(5)

C(57) -4985(16) 9050(5) -318(11) 43(4)

C(58) -2775(15) 8864(5) 918(10) 32(3)

C(34) -1485(6) 10648(2) 654(5) 38(2)

C(35) -1002(8) 11206(2) 2078(5) 54(2)

C(39) 1358(6) 11193(2) 2164(4) 41(2)

C(40) 627(8) 10647(2) 3124(5) 53(2)

C(49) -2958(7) 9385(2) -3120(4) 43(2)

C(36) -1172(11) 11673(2) 1669(7) 52(3)

C(37) -2002(11) 11145(4) 2552(8) 50(3)

C(38) 441(10) 11112(2) 2711(6) 39(2)

C(50) -2021(11) 9464(3) -3695(7) 50(3)

C(51) -4319(12) 9526(4) -3726(8) 65(3)

C(52) -2781(10) 8921(2) -2734(7) 49(3)

C(62) -1794(19) 9100(6) -3046(14) 32(4)

C(63) -3610(20) 9572(8) -4113(9) 52(6)

C(59) 164(10) 11470(4) 2069(19) 59(7)

C(64) -3960(20) 9084(7) -2932(19) 61(7)

C(61) -662(17) 10886(8) 2912(16) 81(9)

C(60) -2300(40) 11385(13) 2020(30) 98(12)

C(41) -2700(6) 9833(2) 26(4) 36(2)

C(42) -3852(7) 9195(2) 586(5) 41(2)

C(45) -1666(7) 8995(2) 1828(5) 42(2)

C(46) -2242(6) 8714(2) 135(4) 38(2)

C(48) -2229(6) 9914(2) -1648(4) 33(1)

O(1W) -5886(14) 8092(5) 519(10) 47(4) _________________________________________________________________

**Table S23.** Anisotropic displacement parameters (Å2x103) for [Rh2(dimen)4][Calix]2·0.64H2O (**8**) at 90K.

_______________________________________________________________________

Atom U11 U22 U33 U23 U13 U12

_______________________________________________________________________

Rh(1) 58(1) 29(1) 30(1) -10(1) 20(1) -13(1)

N(1) 38(3) 32(3) 41(3) -1(2) 15(3) -15(2)

N(2) 47(4) 46(3) 37(3) -20(3) 22(3) -9(3)

N(3) 55(4) 32(3) 35(3) 0(2) 22(3) -8(3)

N(4) 56(3) 32(3) 30(3) -10(2) 16(2) -13(3)

O(1) 62(3) 66(3) 37(3) 6(2) 11(3) 6(3)

O(2) 50(3) 41(3) 51(3) 13(2) 15(2) -5(2)

O(3) 67(4) 69(3) 47(3) 21(3) 15(3) -12(3)

O(4) 51(3) 49(3) 36(3) -9(2) 13(2) -18(2)

C(1) 35(4) 36(3) 31(3) -5(3) 21(3) -13(3)

C(2) 32(4) 36(3) 43(4) -1(3) 21(3) -3(3)

C(3) 33(4) 41(4) 29(3) -4(3) 8(3) -10(3)

C(4) 44(4) 26(3) 36(4) -9(3) 16(3) -7(3)

C(5) 41(4) 20(3) 43(4) 6(3) 17(3) -4(3)

C(6) 34(4) 46(4) 20(3) 4(3) 3(3) -10(3)

C(7) 44(4) 26(3) 67(5) 5(3) 18(4) -2(3)

C(8) 51(4) 17(3) 69(5) 8(3) 27(4) 9(3)

C(9) 55(5) 28(3) 54(4) -1(3) 17(4) 8(3)

C(10) 63(5) 48(4) 66(5) 2(4) 37(5) 12(4)

C(11) 48(5) 33(4) 74(5) 4(4) 28(4) 11(3)

C(12) 43(4) 29(3) 58(5) 7(3) 18(4) 9(3)

C(13) 38(4) 22(3) 52(4) 9(3) 7(3) 2(3)

C(14) 30(4) 45(4) 69(5) 16(4) 11(4) -1(3)

C(15) 26(3) 33(3) 48(4) 4(3) 5(3) -3(3)

C(16) 34(4) 36(4) 49(4) 3(3) 17(3) -4(3)

C(17) 46(4) 35(4) 57(4) 4(3) 30(4) -5(3)

C(18) 51(4) 29(3) 51(4) -3(3) 23(4) -8(3)

C(19) 37(4) 38(3) 36(3) -14(3) 8(3) -11(3)

C(20) 34(4) 52(4) 30(4) 8(3) 5(3) -16(3)

C(21) 62(5) 62(5) 39(4) -17(3) 25(4) -25(4)

C(22) 56(5) 47(4) 32(4) -22(3) 25(3) -22(4)

C(23) 66(5) 40(4) 46(4) -23(3) 32(4) -15(4)

C(24) 73(6) 47(4) 39(4) -15(3) 26(4) 0(4)

C(25) 53(5) 55(5) 36(4) -20(3) 23(3) -3(4)

C(26) 51(4) 47(4) 25(3) -18(3) 23(3) -16(3)

C(27) 60(5) 46(4) 24(3) -20(3) 23(3) -10(4)

C(28) 50(4) 63(4) 38(4) -17(4) 29(3) -16(4)

C(29) 32(4) 42(4) 29(3) -19(3) 9(3) -5(3)

C(30) 35(4) 31(3) 46(4) 7(3) 10(3) -4(3)

C(31) 50(7) 27(5) 55(7) -5(5) 20(6) -6(5)

C(32) 31(6) 33(6) 34(6) 7(4) 7(5) -8(4)

C(33) 34(6) 33(6) 30(6) 11(4) 4(5) -5(5)

C(43) 41(8) 54(8) 89(10) 11(7) 27(7) 9(6)

C(44) 63(8) 40(6) 43(7) 11(5) 31(6) 1(6)

C(47) 55(8) 37(6) 50(7) -2(5) 5(6) -12(6)

C(34) 42(4) 35(3) 39(4) -5(3) 18(3) -7(3)

C(35) 68(5) 56(5) 44(4) -29(4) 28(4) -4(4)

C(39) 52(4) 34(3) 35(4) -5(3) 10(3) -16(3)

C(40) 67(5) 60(5) 39(4) -8(3) 26(4) -17(4)

C(49) 59(5) 36(4) 30(3) -14(3) 10(3) -10(3)

C(36) 69(8) 37(6) 60(7) -20(5) 35(6) -12(5)

C(37) 56(7) 57(7) 48(6) -25(5) 33(6) -9(5)

C(38) 56(7) 35(5) 31(5) -21(4) 21(5) -6(4)

C(50) 85(9) 35(5) 32(5) -17(4) 22(6) -8(5)

C(51) 70(8) 51(7) 56(7) -18(6) -2(6) -11(6)

C(52) 53(7) 37(6) 56(7) -15(5) 16(6) -13(5) ______________________________________________________________________

**Table S24.** Selected Bond Lengths (Å) and Angles () for [Rh2(dimen)4][Calix]2·0.64H2O (**8**) at 90K.

________________________________________________________________________

Rh(1)-C(41) 1.949(6)

Rh(1)-C(48) 1.960(6)

Rh(1)-C(34) 1.968(6)

Rh(1)-C(29) 1.971(7)

N(1)-C(29) 1.141(7)

N(1)-C(30) 1.459(7)

N(2)-C(34) 1.137(7)

N(2)-C(35) 1.484(7)

N(3)-C(41) 1.152(7)

N(3)-C(42) 1.451(8)

N(4)-C(48) 1.162(7)

N(4)-C(49) 1.448(7)

O(1)-C(6) 1.347(7)

O(2)-C(13) 1.345(8)

O(3)-C(20) 1.361(7)

O(4)-C(27) 1.348(8)

C(1)-C(6) 1.387(9)

C(1)-C(2) 1.389(9)

C(1)-C(28) 1.524(8)

C(2)-C(3) 1.358(8)

C(3)-C(4) 1.398(9)

C(4)-C(5) 1.375(9)

C(5)-C(6) 1.406(8)

C(5)-C(7) 1.508(9)

C(7)-C(8) 1.512(9)

C(8)-C(9) 1.377(9)

C(8)-C(13) 1.419(9)

C(9)-C(10) 1.39(1)

C(10)-C(11) 1.38(1)

C(11)-C(12) 1.37(1)

C(12)-C(13) 1.409(9)

C(12)-C(14) 1.53(1)

C(14)-C(15) 1.512(9)

C(15)-C(16) 1.390(9)

C(15)-C(20) 1.402(9)

C(16)-C(17) 1.377(9)

C(17)-C(18) 1.385(9)

C(18)-C(19) 1.387(9)

C(19)-C(20) 1.407(9)

C(19)-C(21) 1.518(9)

C(21)-C(22) 1.50(1)

C(22)-C(23) 1.38(1)

C(22)-C(27) 1.407(9)

C(23)-C(24) 1.37(1)

C(24)-C(25) 1.39(1)

C(25)-C(26) 1.39(1)

C(26)-C(27) 1.388(9)

C(26)-C(28) 1.510(9)

C(30)-C(53) 1.48(2)

C(30)-C(55) 1.48(2)

C(30)-C(54) 1.507(5)

C(30)-C(32) 1.53(1)

C(30)-C(33) 1.53(1)

C(30)-C(31) 1.56(1)

C(32)-C(45)#1 1.51(1)

C(32)-C(46)#1 1.55(1)

C(43)-C(42) 1.50(1)

C(44)-C(45) 1.49(1)

C(44)-C(42) 1.53(1)

C(47)-C(46) 1.52(1)

C(47)-C(42) 1.54(13)

C(53)-C(46)#1 1.51(2)

C(54)-C(45)#1 1.53(2)

C(56)-C(42) 1.50(2)

C(57)-C(42) 1.54(2)

C(58)-C(42) 1.49(2)

C(58)-C(45) 1.52(2)

C(58)-C(46) 1.54(2)

C(35)-C(60) 1.49(4)

C(35)-C(37) 1.495(1)

C(35)-C(59) 1.504(5)

C(35)-C(61) 1.516(5)

C(35)-C(36) 1.528(5)

C(35)-C(38) 1.55(1)

C(39)-C(38) 1.51(1)

C(39)-C(59) 1.511(5)

C(39)-C(62)#1 1.52(2)

C(39)-C(52)#1 1.52(1)

C(40)-C(50)#1 1.50(1)

C(40)-C(61) 1.511(5)

C(40)-C(62)#1 1.52(2)

C(40)-C(38) 1.524(5)

C(49)-C(51) 1.50(1)

C(49)-C(62) 1.50(2)

C(49)-C(52) 1.507(5)

C(49)-C(63) 1.511(5)

C(49)-C(64) 1.520(5)

C(49)-C(50) 1.56(1)

C(50)-C(40)#1 1.50(1)

C(52)-C(39)#1 1.52(1)

C(62)-C(39)#1 1.52(2)

C(62)-C(40)#1 1.52(2)

C(45)-C(32)#1 1.51(1)

C(45)-C(54)#1 1.53(2)

C(46)-C(53)#1 1.51(2)

C(46)-C(32)#1 1.55(1)

________________________________________________________________________

________________________________________________________________________

C(41)-Rh(1)-C(48) 88.1(2)

C(41)-Rh(1)-C(34) 91.6(2)

C(48)-Rh(1)-C(34) 176.5(3)

C(41)-Rh(1)-C(29) 175.2(2)

C(48)-Rh(1)-C(29) 94.6(2)

C(34)-Rh(1)-C(29) 85.5(2)

C(29)-N(1)-C(30) 176.2(6)

C(34)-N(2)-C(35) 175.4(7)

C(41)-N(3)-C(42) 169.1(6)

C(48)-N(4)-C(49) 175.0(6)

C(6)-C(1)-C(2) 117.7(5)

C(6)-C(1)-C(28) 121.4(6)

C(2)-C(1)-C(28) 120.9(6)

C(3)-C(2)-C(1) 123.1(6)

C(2)-C(3)-C(4) 118.2(6)

C(5)-C(4)-C(3) 121.4(6)

C(4)-C(5)-C(6) 118.7(6)

C(4)-C(5)-C(7) 119.8(6)

C(6)-C(5)-C(7) 121.6(6)

O(1)-C(6)-C(1) 118.4(6)

O(1)-C(6)-C(5) 120.6(6)

C(1)-C(6)-C(5) 120.9(5)

C(5)-C(7)-C(8) 115.9(5)

C(9)-C(8)-C(13) 119.3(6)

C(9)-C(8)-C(7) 120.8(7)

C(13)-C(8)-C(7) 119.9(6)

C(8)-C(9)-C(10) 121.5(7)

C(11)-C(10)-C(9) 118.6(7)

C(12)-C(11)-C(10) 122.1(7)

C(11)-C(12)-C(13) 119.6(7)

C(11)-C(12)-C(14) 121.1(7)

C(13)-C(12)-C(14) 119.1(6)

O(2)-C(13)-C(12) 119.2(6)

O(2)-C(13)-C(8) 121.8(6)

C(12)-C(13)-C(8) 118.9(7)

C(15)-C(14)-C(12) 111.1(5)

C(16)-C(15)-C(20) 117.3(6)

C(16)-C(15)-C(14) 120.8(6)

C(20)-C(15)-C(14) 121.8(6)

C(17)-C(16)-C(15) 122.3(6)

C(16)-C(17)-C(18) 119.1(6)

C(17)-C(18)-C(19) 121.5(6)

C(18)-C(19)-C(20) 118.0(6)

C(18)-C(19)-C(21) 120.8(6)

C(20)-C(19)-C(21) 121.2(6)

O(3)-C(20)-C(15) 120.2(6)

O(3)-C(20)-C(19) 118.3(6)

C(15)-C(20)-C(19) 121.5(6)

C(22)-C(21)-C(19) 115.7(5)

C(23)-C(22)-C(27) 118.2(7)

C(23)-C(22)-C(21) 121.2(6)

C(27)-C(22)-C(21) 120.5(7)

C(24)-C(23)-C(22) 122.4(7)

C(23)-C(24)-C(25) 118.4(7)

C(24)-C(25)-C(26) 121.8(7)

C(27)-C(26)-C(25) 118.3(6)

C(27)-C(26)-C(28) 121.6(7)

C(25)-C(26)-C(28) 120.0(6)

O(4)-C(27)-C(26) 120.0(6)

O(4)-C(27)-C(22) 119.2(6)

C(26)-C(27)-C(22) 120.8(7)

C(26)-C(28)-C(1) 113.5(5)

N(1)-C(29)-Rh(1) 172.4(5)

N(1)-C(30)-C(53) 105.7(8)

N(1)-C(30)-C(55) 103(1)

C(53)-C(30)-C(55) 111(1)

N(1)-C(30)-C(54) 104.0(9)

C(53)-C(30)-C(54) 114(1)

C(55)-C(30)-C(54) 118(1)

N(1)-C(30)-C(32) 108.2(6)

N(1)-C(30)-C(33) 111.0(6)

C(32)-C(30)-C(33) 112.0(7)

N(1)-C(30)-C(31) 108.7(6)

C(32)-C(30)-C(31) 110.8(7)

C(33)-C(30)-C(31) 106.1(7)

C(45)#1-C(32)-C(30) 111.3(7)

C(45)#1-C(32)-C(46)#1 111.2(7)

C(30)-C(32)-C(46)#1 112.0(7)

C(45)-C(44)-C(42) 113.4(8)

C(46)-C(47)-C(42) 112.1(8)

C(30)-C(53)-C(46)#1 118(1)

C(30)-C(54)-C(45)#1 112(1)

C(42)-C(58)-C(45) 114(1)

C(42)-C(58)-C(46) 114(1)

C(45)-C(58)-C(46) 111(1)

N(2)-C(34)-Rh(1) 175.4(6)

N(2)-C(35)-C(60) 104(2)

N(2)-C(35)-C(37) 107.2(6)

N(2)-C(35)-C(59) 108(1)

N(2)-C(35)-C(61) 100(1)

C(60)-C(35)-C(61) 104(2)

C(59)-C(35)-C(61) 112(1)

N(2)-C(35)-C(36) 108.4(6)

C(37)-C(35)-C(36) 107.1(7)

N(2)-C(35)-C(38) 106.1(5)

C(37)-C(35)-C(38) 116.0(7)

C(36)-C(35)-C(38) 111.7(7)

C(59)-C(39)-C(62)#1 114(1)

C(38)-C(39)-C(52)#1 113.3(7)

C(61)-C(40)-C(62)#1 119(1)

C(50)#1-C(40)-C(38) 113.8(7)

N(4)-C(49)-C(51) 105.4(6)

N(4)-C(49)-C(62) 107.4(9)

N(4)-C(49)-C(52) 109.2(6)

C(51)-C(49)-C(52) 117.6(7)

N(4)-C(49)-C(63) 118(1)

C(62)-C(49)-C(63) 113(1)

N(4)-C(49)-C(64) 106(1)

C(62)-C(49)-C(64) 106(1)

C(63)-C(49)-C(64) 107(2)

N(4)-C(49)-C(50) 105.9(6)

C(51)-C(49)-C(50) 108.7(7)

C(52)-C(49)-C(50) 109.4(7)

C(39)-C(38)-C(40) 110.4(6)

C(39)-C(38)-C(35) 111.1(6)

C(40)-C(38)-C(35) 112.4(7)

C(40)#1-C(50)-C(49) 112.3(7)

C(49)-C(52)-C(39)#1 113.3(7)

C(49)-C(62)-C(39)#1 114(1)

C(49)-C(62)-C(40)#1 114(1)

C(39)#1-C(62)-C(40)#1 110(1)

C(35)-C(59)-C(39) 113.6(8)

C(40)-C(61)-C(35) 115.2(8)

N(3)-C(41)-Rh(1) 177.0(6)

N(3)-C(42)-C(58) 105.6(7)

N(3)-C(42)-C(56) 112.8(9)

C(58)-C(42)-C(56) 112(1)

N(3)-C(42)-C(43) 109.0(7)

N(3)-C(42)-C(47) 107.8(6)

C(43)-C(42)-C(47) 112.7(8)

N(3)-C(42)-C(44) 108.3(6)

C(43)-C(42)-C(44) 111.2(8)

C(47)-C(42)-C(44) 107.6(7)

N(3)-C(42)-C(57) 105.3(8)

C(58)-C(42)-C(57) 113.3(10)

C(56)-C(42)-C(57) 107.5(11)

C(44)-C(45)-C(32)#1 113.1(7)

C(58)-C(45)-C(54)#1 116(1)

C(53)#1-C(46)-C(58) 113.7(9)

C(47)-C(46)-C(32)#1 109.1(7)

N(4)-C(48)-Rh(1) 175.7(5)

________________________________________________________________________

Symmetry transformations used to generate equivalent atoms:

#1 -x,-y+2,-z
